# Supplementary material for: Highly enantioselective hydrogenation of α-aryl-β-substituted acrylic acids catalyzed by Ir-SpinPHOX
Source: Royal Society of Chemistry journal article supplement (doi:10.1039/b919902k), 2009-11-25
Supplement: b919902k.pdf [file b919902k.pdf]

– Electronic Supplementary Information (ESI) –

## Highly enantioselective hydrogenation of $\alpha$ -aryl- $\beta$ -substituted acrylic acids catalyzed by Ir-SpinPHOX

Yi Zhang,<sup>a,b</sup> Zhaobin Han,<sup>b</sup> Fuying Li,<sup>a</sup> Kuiling Ding,<sup>b,\*</sup> Ao Zhang<sup>a,\*</sup>

<sup>a</sup> *Synthetic Organic & Medicinal Chemistry Laboratory, Shanghai Institute of Materia Medica (SIMM), Chinese Academy of Sciences, 555 Zuchongzhi Road, Shanghai 201203 (P.R. China). E-mail: aozhang@mail.shcnc.ac; Fax: (+86) 21 50806035*

<sup>b</sup> *State Laboratory of Organometallic Chemistry, Shanghai Institute of Organic Chemistry, Chinese Academy of Sciences, 345 Lingling Road, Shanghai, 200032 (P.R. China). E-mail: kding@mail.sioc.ac.cn; Fax: (+86) 21 64166128.*

**General.** All reactions and manipulations were performed using standard Schlenk techniques. Anhydrous THF and toluene were distilled from sodium benzophenone ketyl. Anhydrous DCE, Et<sub>3</sub>N and isopropyl alcohol were distilled from CaH<sub>2</sub> under an atmosphere of argon. Anhydrous MeOH and EtOH were distilled from magnesium under nitrogen atmosphere. Melting points were measured on a RY-I apparatus and uncorrected. <sup>1</sup>H, <sup>13</sup>C, <sup>31</sup>P and <sup>19</sup>F NMR spectra were recorded on Varian Mercury 300 MHz or 400 MHz spectrometers. Chemical shifts (δ values) were reported in ppm downfield from internal TMS (<sup>1</sup>H NMR) or CDCl<sub>3</sub> (<sup>13</sup>C NMR), external 85% H<sub>3</sub>PO<sub>4</sub> (<sup>31</sup>P NMR) and external CF<sub>3</sub>CO<sub>2</sub>H (<sup>19</sup>F NMR), respectively. Optical rotations were determined using a Perkin Elmer 341 MC polarimeter. EI (70 ev) and MALDI-TOF mass spectra were obtained on Agilent 5973N and MATRIX VOYAGR-DE STR spectrometers, respectively. HRMS(MALDI) were determined on IonSpect 4.7 TESLA FTMS spectrometers. HPLC analyses were performed on a JASCO 2089 or Techcomp N2000 liquid chromatograph.

**Materials.** (±)-Spiro[4,4]-1,6-nonane-diketone was prepared in >50% overall yield in hundreds-gram scale from industrially available diethyl adipate and ethyl 4-bromobutanoate by following a modified literature procedure.<sup>S1</sup> [Ir(COD)Cl]<sub>2</sub> was purchased from Stream Co. and used as received. NaBAR<sub>F</sub> was prepared according to the literature procedure.<sup>S2</sup> The ligand **2a-e** and their Ir(I) complexes were prepared according to our previous reported procedure.<sup>S3</sup> All acids were prepared according to the reported procedures.<sup>S4</sup> Acids **1b-d,f,i-k** and products **3b-e,i-j,l** are known compounds and their <sup>1</sup>H NMR data are consistent with those of the literatures.<sup>S5-S10</sup>

**Preparation and Analytical Data of Spiro Phosphino-Oxazoline Ligands.** The synthetic pathway of the ligands similar to our previous report is outlined as follow<sup>S3</sup>:

---

(S1) J. A. Nieman and B. A. Keay, *Synth. Commun.*, 1999, **29**, 3829.

(S2) D. L. Reger, T. D. Wright, C. A. Little, J. J. S. Lamba and M. D. Smith, *Inorg. Chem.*, 2001, **40**, 3810.

(S3) Z. Han, Z. Wang, X. Zhang and K. Ding, *Angew. Chem., Int. Ed.*, 2009, **48**, 5345.

(S4) P. H. Briner, M. C. T. Fyfe, J. P. Madeley, P. J. Murray, M. J. Procter and F. Spindler, *Int. Pat.*, WO 2006/016178, 2006.

(S5) G. Argouarch, O. Samuel and H. B. Kagan, *Eur. J. Org. Chem.*, 2000, **39**, 2885.

(S6) G. Sarakinos and E. J. Corey, *Org. Lett.*, 1999, **1**, 1741.

(S7) S. Li, S.-F. Zhu, C.-M. Zhang, S. Song and Q.-L. Zhou, *J. Am. Chem. Soc.*, 2008, **130**, 8584.

(S8) M. C. T. Fyfe, L. S. Gardner, M. Nawano, M. J. Procter, C. M. Rasamison, K. L. Schofield, V. K. Shah and K. Yasuda, *Int. Pat.*, WO 2004/072031, 2004.

(S9) G. R. Bebernitz and L. Kirman, *Int. Pat.*, WO 2007/041366, 2007.

(S10) S. Chen, P. T. W. Cheng and R. A. Smirk, *Int. Pat.*, WO 2008/005914, 2008.

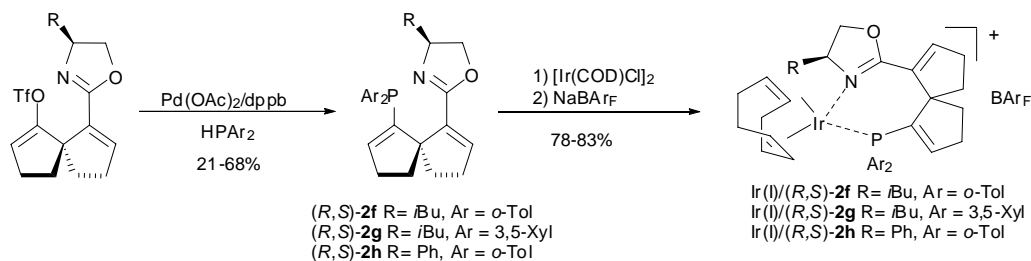

### Analytic data for ligand 2f-h

#### $(R,S)$ -2f (R = *i*Bu, Ar = *o*-Tol)

Colorless oil, yield 68%; <sup>1</sup>H NMR (300 MHz, CDCl<sub>3</sub>) δ = 7.26-7.00 (m, 8H), 6.43 (br s, 1H), 5.43 (d, *J* = 2.7 Hz, 1H), 3.96-3.91 (m, 2H), 3.81-3.74 (m, 1H), 2.82-2.69 (m, 2H), 2.56-2.23 (m, 10H), 1.91-1.81 (m, 2H), 1.56-1.49 (m, 2H), 1.18-1.11 (m, 1H), 0.91 (t, *J* = 6.6 Hz, 3H), 0.80 (d, *J* = 6.6 Hz, 3H) ppm; <sup>31</sup>P NMR (121 MHz, CDCl<sub>3</sub>) δ = -43.95 (s) ppm; ESI-MS *m/z* : 458.2 [M+H<sup>+</sup>]; HRMS (MALDI) *m/z*: calcd. for C<sub>30</sub>H<sub>37</sub>NOP: 458.2607, Found: 458.2603 [M+H<sup>+</sup>].

#### $(R,S)$ -2g (R = *i*Bu, Ar = 3,5-Xyl)

Colorless oil, yield 21%; <sup>1</sup>H NMR (300 MHz, CDCl<sub>3</sub>) δ = 7.03 (d, *J* = 6.3 Hz, 2H), 6.95-6.93 (m, 2H), 6.86 (s, 1H), 6.42 (s, 1H), 5.68 (t, *J* = 2.1 Hz, 1H), 4.03-3.97 (m, 2H), 3.82-3.78 (m, 1H), 2.70-2.63 (m, 1H), 2.54-2.36 (m, 3H), 2.33-2.30 (m, 1H), 2.28 (s, 6H), 2.24 (s, 6H), 2.13-2.06 (m, 1H), 1.92-1.82 (m, 2H), 1.55-1.47 (m, 2H), 1.18-1.48 (m, 1H), 0.92 (t, *J* = 2.7 Hz, 3H), 0.80 (d, *J* = 4.8 Hz, 3H) ppm; <sup>31</sup>P NMR (121 MHz, CDCl<sub>3</sub>) δ = -26.76 (s) ppm.

#### $(R,S)$ -2h (R = Ph, Ar = *o*-Tol)

Colorless oil, yield 41%; <sup>1</sup>H NMR (400 MHz, CDCl<sub>3</sub>) δ = 7.32-7.08 (m, 13H), 6.58-6.57 (m, 1H), 5.46-5.44 (m, 1H), 5.15 (t, *J* = 9.2 Hz, 1H), 4.33 (dt, *J* = 8.0 Hz, 1H), 3.83 (t, *J* = 8.2 Hz, 1H), 2.91-2.84 (m, 1H), 2.80-2.74 (m, 1H), 2.61-2.56 (m, 1H), 2.45 (s, 3H), 2.37 (s, 3H), 2.36-2.29 (m, 3H), 1.97-1.88 (m, 2H) ppm; <sup>31</sup>P NMR (162 MHz, CDCl<sub>3</sub>) δ = -45.33 (s) ppm.

### Analytic data for Ir complex of 2f-h

#### Ir(I)/ $(R,S)$ -2f (R = *i*Bu, Ar = *o*-Tol)

Red powder, yield 83%; M.p. = 180-183 °C; [α]<sub>D</sub><sup>20</sup> = -16.1° (*c* 0.51, CHCl<sub>3</sub>); <sup>1</sup>H NMR (300 MHz, CDCl<sub>3</sub>) δ = 9.25 (q, *J* = 7.2 Hz, 1H), 7.72 (br s, 8H), 7.58-7.52 (m, 5H), 7.45-7.34 (m, 4H), 7.19-7.15 (m, 1H), 7.09-7.02 (m, 1H), 6.07-6.00 (m, 2H), 5.27 (br s, 1H), 4.54-4.49 (m, 1H), 4.38-4.35 (m, 2H), 4.24-4.19 (m, 1H), 2.82-2.79 (m, 1H), 2.69 (s, 3H), 2.57-2.29 (m, 5H), 2.13 (s, 3H), 2.09-1.69 (m, 9H), 1.42-1.20 (m, 6H), 0.98 (t, *J* = 7.2 Hz, 3H), 0.82 (d, *J* = 6.9 Hz, 3H) ppm; <sup>13</sup>C NMR (75 MHz, CDCl<sub>3</sub>) δ = 117.6 (d, *J* = 1.8 Hz), 161.7 (q, *J* = 49.7 Hz), 144.4 (d, *J* = 3.7 Hz), 145.3, 143.1, 142.4, 142.1, 140.5, 140.4, 135.2, 134.8, 134.6, 133.1 (d, *J* = 6.7 Hz), 132.9 (d, *J* = 2.5 Hz), 132.6 (d, *J* = 6.1 Hz), 132.1 (d, *J* = 7.9 Hz), 131.7 (d, *J* = 2.5 Hz), 130.4, 130.0, 129.5 (m), 129.1 (m), 128.7 (m), 128.3 (m), 126.3, 126.1, 125.9, 125.7 (2 peak), 125.6, 123.7, 123.0, 122.7, 119.1, 117.6-117.3 (m), 89.7 (d, *J* = 7.9 Hz), 80.0 (d, *J* = 16.4 Hz), 73.4, 69.1, 68.9, 68.5, 68.0, 59.6, 42.5 (d, *J* = 6.0 Hz), 38.6, 35.8 (d, *J* = 4.9 Hz), 34.2, 33.8, 31.7, 31.2 (d, *J* =

12.1 Hz), 27.9, 26.4, 25.6, 24.6, 24.5, 23.0 (d,  $J = 3.7$  Hz), 12.0, 11.6 ppm;  $^{31}\text{P}$  NMR (121 MHz,  $\text{CDCl}_3$ )  $\delta = 2.52$  (s) ppm;  $^{19}\text{F}$  NMR (282 MHz,  $\text{CDCl}_3$ )  $\delta = -62.80$  (s) ppm; IR (film)  $\nu$  2972, 2840, 1671, 1592, 1507, 1458, 1387, 1352, 1275, 1167, 1128, 1030, 900, 886, 834, 776, 716, 681, 668  $\text{cm}^{-1}$ ; MS (MALDI)  $m/z$ : 648.5  $[\text{M-COD-BAr}_F]^+$ ; HRMS (MALDI)  $m/z$  calcd. for  $\text{C}_{38}\text{H}_{48}\text{NOP}^{191}\text{Ir}^+ [\text{M-BAr}_F]^+$ : 756.3074, Found: 756.3073.

#### **Ir(I)/(R,S)-2g (R = *i*Bu, Ar = 3,5-Xyl)**

Red powder, yield 80%; M.p. = 124-125 °C;  $[\alpha]_D^{20} = -10.0^\circ$  ( $c$  0.26,  $\text{CHCl}_3$ );  $^1\text{H}$  NMR (300 MHz,  $\text{CDCl}_3$ )  $\delta = 7.71$  (s, 8H), 7.52 (s, 4H), 7.43 (d,  $J = 11.7$  Hz, 2H), 7.18-7.09 (m, 4H), 6.24 (s, 1H), 6.16 (d,  $J = 7.8$  Hz, 1H), 5.03 (br s, 1H), 4.47-4.22 (m, 4H), 3.31 (br s, 1H), 3.10-3.05 (m, 1H), 2.48-2.27 (m, 15H), 2.13-1.70 (m, 10H), 1.53-1.16 (m, 6H), 0.97 (t,  $J = 8.2$  Hz, 3H), 0.80 (d,  $J = 8.2$  Hz, 3H);  $^{13}\text{C}$  NMR (75 MHz,  $\text{CDCl}_3$ )  $\delta = 169.3$ , 161.7 (q,  $J = 50.2$  Hz), 146.7 (d,  $J = 2.6$  Hz), 140.2, 138.9, 138.8, 138.7, 138.6 (2 peak), 138.1, 134.8, 133.6 (m), 133.1, 133.0, 130.9, 130.8, 130.0, 129.5 (m), 129.2 (m), 128.7 (m), 128.5, 128.3 (m), 126.9, 126.3, 126.2, 122.7, 119.1, 117.6 (m), 90.3 (d,  $J = 8.7$  Hz), 82.1 (d,  $J = 16.0$  Hz), 69.7 (d,  $J = 2.2$  Hz), 69.3, 68.7, 68.5, 60.8, 40.5 (d,  $J = 6.6$  Hz), 38.7, 35.8, 35.6 (d,  $J = 5.0$  Hz), 33.3, 32.5, 31.5, 31.3, 29.7, 28.7, 26.3, 26.1, 21.4, 21.2, 12.8, 11.6;  $^{31}\text{P}$  NMR (121 MHz,  $\text{CDCl}_3$ )  $\delta = 2.63$  (s);  $^{19}\text{F}$  NMR (282 MHz,  $\text{CDCl}_3$ )  $\delta = -62.83$  (s); IR (film)  $\nu$  2963, 1684, 1653, 1608, 1558, 1541, 1507, 1457, 1354, 1277, 1163, 1126, 887, 796, 714, 682, 670  $\text{cm}^{-1}$ ; MS (MALDI)  $m/z$ : 784.3  $[\text{M-BAr}_F]^+$ , 676.2  $[\text{M-COD-BAr}_F]^+$ ; HRMS (MALDI)  $m/z$  calcd. for  $\text{C}_{40}\text{H}_{52}\text{NOP}^{191}\text{Ir}^+ [\text{M-BAr}_F]^+$ : 784.3387, Found: 784.3366.

#### **Ir(I)/(R,S)-2h (R = Ph, Ar = *o*-Tol)**

Red powder, yield 78%; M.p. = 206-208 °C;  $[\alpha]_D^{20} = -13.4^\circ$  ( $c$  1.2,  $\text{CHCl}_3$ );  $^1\text{H}$  NMR (400 MHz,  $\text{CDCl}_3$ )  $\delta = 9.29$  (q,  $J = 6.8$  Hz, 2H), 7.73 (s, 8H), 7.58-7.42 (m, 9H), 7.37-7.30 (m, 4H), 7.22-7.19 (m, 1H), 7.12-7.07 (m, 1H), 7.01-6.97 (m, 1H), 6.18 (s, 1H), 5.96 (d,  $J = 8$  Hz, 1H), 5.59-5.55 (m, 1H), 5.47-5.40 (m, 1H), 4.88 (t,  $J = 9.2$  Hz, 1H), 4.60-4.56 (m, 1H), 4.45-4.41 (m, 1H), 3.16-3.12 (m, 3H), 2.68-2.52 (m, 4H), 2.30-2.23 (m, 4H), 2.18 (s, 3H), 2.12-1.94 (m, 2H), 1.91 (s, 3H), 1.68-1.52 (m, 2H), 1.39-1.21 (m, 3H) ppm;  $^{13}\text{C}$  NMR (100 MHz,  $\text{CDCl}_3$ )  $\delta = 171.5$ , 161.7 (q,  $J = 49.4$  Hz), 145.3, 145.1, 143.2, 142.1 (d,  $J = 27.7$  Hz), 140.9 (d,  $J = 10.9$  Hz), 138.6, 134.8, 133.1 (d,  $J = 6.3$  Hz), 132.8 (d,  $J = 1.9$  Hz), 132.4 (q,  $J = 5.8$  Hz), 131.9 (d,  $J = 8.5$  Hz), 131.4 (d,  $J = 1.2$  Hz), 130.2, 129.9, 129.7, 129.1 (q,  $J = 2.9$  Hz), 129.0 (q,  $J = 2.9$  Hz), 128.7 (q,  $J = 2.8$  Hz), 128.6, 128.5 (q,  $J = 2.8$  Hz), 127.0, 126.0, 125.9, 125.4 (d,  $J = 8.1$  Hz), 125.0, 124.6, 123.8, 123.2, 123.2, 120.4, 117.5-117.4 (m), 89.1 (d,  $J = 2.9$  Hz), 78.4 (d,  $J = 18.5$  Hz), 75.6, 73.8, 69.4, 69.1 (d,  $J = 13.6$  Hz), 59.1, 42.9 (d,  $J = 6.8$  Hz), 35.4 (d,  $J = 4.5$  Hz), 34.2, 34.1, 31.8, 31.3, 31.1, 29.7, 27.9, 25.4, 24.1 (d,  $J = 9.7$  Hz), 22.9 (d,  $J = 3.5$  Hz) ppm;  $^{31}\text{P}$  NMR (162 MHz,  $\text{CDCl}_3$ )  $\delta = -1.21$  (s) ppm;  $^{19}\text{F}$  NMR (376 MHz,  $\text{CDCl}_3$ )  $\delta = -61.68$  (s) ppm; IR (film)  $\nu$  2921, 2849, 1668, 1594, 1458, 1386, 1354, 1278, 1161, 1127, 1031, 947, 888, 839, 805, 757, 744, 714, 682, 671, 595  $\text{cm}^{-1}$ ; MS (MALDI)  $m/z$ : 778.3  $[\text{M-BAr}_F]^+$ ; HRMS (MALDI)  $m/z$  calcd. For  $\text{C}_{40}\text{H}_{44}\text{NOP}^{191}\text{Ir}^+ [\text{M-BAr}_F]^+$ : 776.2761, Found: 776.2787.

### Spectral data for acids 1a-l

#### **(E)-2-Phenyl-3-(tetrahydro-2H-pyran-4-yl)acrylic acid (1a)**

white solid, M.p. = 145-147 °C; <sup>1</sup>H NMR (400 MHz, CDCl<sub>3</sub>) δ = 10.96 (br s, 1H), 7.39-7.33 (m, 3H), 7.17-7.14 (m, 2H), 6.94 (d, *J* = 10.0 Hz, 1H), 3.93-3.89 (m, 2H), 3.30-3.23 (m, 2H), 2.42-2.32 (m, 1H), 1.61-1.55 (m, 2H), 1.50-1.46 (m, 2H) ppm; <sup>13</sup>C NMR (100 MHz, CDCl<sub>3</sub>) δ = 172.0, 149.6, 134.6, 132.6, 129.4, 128.1, 127.7, 66.7, 35.5, 31.3 ppm; HRMS-EI (m/z) M<sup>+</sup> calcd. for C<sub>14</sub>H<sub>16</sub>O<sub>3</sub>. 232.1099, found 232.1096.

#### **2-Phenylacrylic acid (1b)<sup>S5</sup>**

white solid, M.p. = 101-103 °C; <sup>1</sup>H NMR (400 MHz, CDCl<sub>3</sub>) δ = 10.03 (br s, 1H), 7.44-7.30 (m, 5H), 6.54 (d, *J* = 0.8 Hz, 1H), 6.01 (d, *J* = 0.8 Hz, 1H) ppm; <sup>13</sup>C NMR (100 MHz, CDCl<sub>3</sub>) δ = 172.2, 140.6, 136.0, 129.4, 128.4, 128.3, 128.1 ppm; HRMS-EI (m/z) M<sup>+</sup> calcd. for C<sub>9</sub>H<sub>8</sub>O<sub>2</sub>. 148.0524 found 148.0526.

#### **(E)-2-Phenylbut-2-enoic acid (1c)<sup>S6</sup>**

white solid, M.p. = 143-145 °C; <sup>1</sup>H NMR (400 MHz, CDCl<sub>3</sub>) δ = 11.63 (br s, 1H), 7.38-7.27 (m, 4H), 7.19-7.16 (m, 2H), 1.76 (d, *J* = 7.2 Hz, 3H) ppm; <sup>13</sup>C NMR (100 MHz, CDCl<sub>3</sub>) δ = 172.6, 142.7, 134.3, 134.1, 129.7, 128.0, 127.5, 15.7 ppm; HRMS-EI (m/z) M<sup>+</sup> calcd. for C<sub>10</sub>H<sub>10</sub>O<sub>2</sub>. 162.0681 found 162.0680.

#### **(E)-2,3-Diphenylacrylic acid (1d)<sup>S7</sup>**

white solid, M.p. = 174-175 °C; <sup>1</sup>H NMR (400 MHz, CDCl<sub>3</sub>) δ = 11.12 (br s, 1H), 7.95 (s, 1H), 7.40-7.32 (m, 3H), 7.24-7.13 (m, 5H), 7.07-7.04 (m, 2H) ppm; <sup>13</sup>C NMR (100 MHz, CDCl<sub>3</sub>) δ = 173.4, 142.4, 135.2, 134.2, 131.6, 130.8, 129.7, 129.4, 128.6, 128.2, 128.0 ppm; HRMS-EI (m/z) M<sup>+</sup> calcd. for C<sub>15</sub>H<sub>12</sub>O<sub>2</sub>. 224.0837 found 224.0831.

#### **(E)-3-Cyclopentyl-2-phenylacrylic acid (1e)**

white solid, M.p. = 104-106 °C; <sup>1</sup>H NMR (400 MHz, CDCl<sub>3</sub>) δ = 11.10 (br s, 1H), 7.38-7.28 (m, 3H), 7.19-7.16 (m, 2H), 7.07 (d, *J* = 10.8 Hz, 1H), 2.54-2.43 (m, 1H), 1.77-1.64 (m, 4H), 1.56-1.35 (m, 4H) ppm; <sup>13</sup>C NMR (100 MHz, CDCl<sub>3</sub>) δ = 172.8, 152.6, 135.0, 131.4, 129.8, 127.9, 127.4, 40.1, 33.4, 25.6 ppm; HRMS-EI (m/z) M<sup>+</sup> calcd. for C<sub>14</sub>H<sub>16</sub>O<sub>2</sub>. 216.1150 found 216.1148.

#### **(E)-2-(4-Methoxyphenyl)-3-(tetrahydro-2H-pyran-4-yl)acrylic acid (1f)<sup>S8</sup>**

white solid, M.p. = 112-114 °C; <sup>1</sup>H NMR (400 MHz, CDCl<sub>3</sub>) δ = 9.60 (br s, 1H), 7.10 (td, *J* = 2.0 Hz, *J* = 8.4 Hz, 2H), 6.93-6.89 (m, 3H), 3.93-3.90 (m, 2H), 3.82 (s, 3H), 3.32-3.26 (m, 2H), 2.46-2.36 (m, 1H), 1.60-1.56 (m, 2H), 1.50-1.47 (m, 2H) ppm; <sup>13</sup>C NMR (100 MHz, CDCl<sub>3</sub>) δ = 172.3, 159.0, 149.5, 132.1, 130.5, 126.8, 113.6, 66.7, 55.1, 35.5, 31.4 ppm; HRMS-EI (m/z) M<sup>+</sup> calcd. for C<sub>15</sub>H<sub>18</sub>O<sub>4</sub>. 262.1205 found 262.1208.

#### **(E)-2-(4-Fluorophenyl)-3-(tetrahydro-2H-pyran-4-yl)acrylic acid (1g)**

white solid, M.p. = 172-173 °C; <sup>1</sup>H NMR (400 MHz, CDCl<sub>3</sub>) δ = 10.58 (br s, 1H), 7.15-7.10 (m, 2H), 7.09-7.03 (m, 2H), 6.96 (d, *J* = 10.4 Hz, 1H), 3.95-3.91 (m, 2H), 3.32-3.25 (m, 2H), 2.40-2.30 (m, 1H), 1.65-1.54 (m, 2H), 1.49-1.45 (m, 2H) ppm; <sup>13</sup>C NMR (100 MHz, CDCl<sub>3</sub>) δ = 171.9, 161.7 (d, *J* = 245.6 Hz), 150.1, 131.6, 131.1 (d, *J* = 8.2 Hz), 130.4 (d, *J* = 3.1 Hz), 115.2 (d, *J* = 21.7 Hz), 66.6, 35.5, 31.2 ppm; <sup>19</sup>F NMR

(376 MHz, CDCl<sub>3</sub>)  $\delta$  = -114.03 (s) ppm; HRMS-EI (m/z) M<sup>+</sup> calcd. for C<sub>14</sub>H<sub>15</sub>O<sub>3</sub>F. 250.1005 found 250.1003.

**(E)-2-(4-Iodophenyl)-3-(tetrahydro-2H-pyran-4-yl)acrylic acid (1h)**

white solid, M.p. = 182-183 °C; <sup>1</sup>H NMR (400 MHz, CDCl<sub>3</sub>)  $\delta$  = 9.83 (br s, 1H), 7.71 (td,  $J$  = 2.0 Hz,  $J$  = 8.8 Hz, 2H), 6.95 (d,  $J$  = 10.4 Hz, 1H), 6.91 (td,  $J$  = 2.0 Hz,  $J$  = 8.4 Hz, 2H), 3.94-3.90 (m, 2H), 3.32-3.25 (m, 2H), 2.40-2.30 (m, 1H), 1.64-1.52 (m, 2H), 1.48-1.44 (m, 2H) ppm; <sup>13</sup>C NMR (100 MHz, CDCl<sub>3</sub>)  $\delta$  = 171.5, 150.2, 137.3, 134.0, 131.5, 131.3, 93.7, 66.6, 35.6, 31.2 ppm; HRMS-EI (m/z) M<sup>+</sup> calcd. for C<sub>14</sub>H<sub>15</sub>O<sub>3</sub>I. 358.0066 found 358.0065.

**(E)-2-(4-(Methylsulfonyl)phenyl)-3-(tetrahydro-2H-pyran-4-yl)acrylic acid (1i)<sup>S8</sup>**

white solid, M.p. = 254-256 °C; <sup>1</sup>H NMR (400 MHz, CDCl<sub>3</sub>)  $\delta$  = 7.97 (d,  $J$  = 8.4 Hz, 2H), 7.38 (d,  $J$  = 8.4 Hz, 2H), 7.05 (d,  $J$  = 10.4 Hz, 1H), 5.83 (br s, 1H), 3.97-3.91 (m, 2H), 3.31-3.23 (m, 2H), 3.29 (t,  $J$  = 11.2 Hz, 2H), 3.10 (s, 3H), 2.34-2.25 (m, 1H), 1.67-1.57 (m, 2H), 1.49-1.46 (m, 2H) ppm; <sup>13</sup>C NMR (100 MHz, CDCl<sub>3</sub>)  $\delta$  = 170.5, 151.2, 140.5, 139.9, 130.9, 130.5, 127.3, 66.5, 44.3, 35.7, 31.1 ppm; HRMS-EI (m/z) M<sup>+</sup> calcd. for C<sub>15</sub>H<sub>18</sub>O<sub>5</sub>S. 310.0875 found 310.0874.

**(E)-2-(4-(Cyclopropylsulfonyl)phenyl)-3-(tetrahydro-2H-pyran-4-yl)acrylic acid (1j)<sup>S8</sup>**

white solid, M.p. = 93-95 °C; <sup>1</sup>H NMR (400 MHz, CDCl<sub>3</sub>)  $\delta$  = 7.91 (d,  $J$  = 8.0 Hz, 2H), 7.37 (d,  $J$  = 8.0 Hz, 2H), 7.02 (d,  $J$  = 10.8 Hz, 1H), 3.95-3.91 (m, 2H), 3.32-3.26 (m, 2H), 2.55-2.47 (m, 1H), 2.35-2.25 (m, 1H), 1.67-1.56 (m, 2H), 1.50-1.46 (m, 2H), 1.40-1.30 (m, 2H), 1.10-1.03 (m, 2H) ppm; <sup>13</sup>C NMR (100 MHz, CDCl<sub>3</sub>)  $\delta$  = 169.9, 150.5, 140.2, 139.9, 131.1, 130.3, 127.4, 66.4, 35.5, 32.6, 31.1, 5.9 ppm; HRMS-EI (m/z) M<sup>+</sup> calcd. for C<sub>17</sub>H<sub>20</sub>O<sub>5</sub>S. 336.1031 found 336.1035.

**(E)-2-(4-(Methylthio)phenyl)-3-(tetrahydro-2H-pyran-4-yl)acrylic acid (1k)<sup>S8</sup>**

white solid, M.p. = 168-170 °C; <sup>1</sup>H NMR (400 MHz, CDCl<sub>3</sub>)  $\delta$  = 10.77 (br s, 1H), 7.24 (td,  $J$  = 2.0 Hz,  $J$  = 8.4 Hz, 2H), 7.09-7.07 (td,  $J$  = 2.0 Hz,  $J$  = 8.4 Hz, 2H), 6.93 (d,  $J$  = 10.4 Hz, 1H), 3.94-3.90 (m, 2H), 3.32-3.25 (m, 2H), 2.49 (s, 3H), 2.45-2.34 (m, 1H), 1.64-1.53 (m, 2H), 1.49-1.45 (m, 2H) ppm; <sup>13</sup>C NMR (100 MHz, CDCl<sub>3</sub>)  $\delta$  = 171.9, 149.7, 138.1, 131.9, 131.1, 129.7, 125.8, 66.6, 35.4, 31.2, 15.4 ppm; HRMS-EI (m/z) M<sup>+</sup> calcd. for C<sub>15</sub>H<sub>18</sub>O<sub>3</sub>S. 278.0977 found 278.0980.

**(E)-2-(4-(Cyclopropylthio)phenyl)-3-(tetrahydro-2H-pyran-4-yl)acrylic acid (1l)**

white solid, M.p. = 152-154 °C; <sup>1</sup>H NMR (400 MHz, CDCl<sub>3</sub>)  $\delta$  = 10.90 (br s, 1H), 7.36 (td,  $J$  = 2.0 Hz,  $J$  = 8.4 Hz, 2H), 7.08 (td,  $J$  = 2.0 Hz,  $J$  = 8.4 Hz, 2H), 6.94 (d,  $J$  = 10.4 Hz, 1H), 3.94-3.90 (m, 2H), 3.32-3.27 (m, 2H), 2.47-2.37 (m, 1H), 2.21-2.15 (m, 1H), 1.64-1.54 (m, 2H), 1.50-1.46 (m, 2H), 1.12-1.02 (m, 2H), 0.73-0.69 (m, 2H) ppm; <sup>13</sup>C NMR (100 MHz, CDCl<sub>3</sub>)  $\delta$  = 172.0, 149.7, 138.7, 132.0, 131.0, 129.7, 125.7, 66.6, 35.4, 31.3, 11.6, 8.4 ppm; HRMS-EI (m/z) M<sup>+</sup> calcd. for C<sub>17</sub>H<sub>20</sub>O<sub>3</sub>S. 304.1133 found 304.1131.

**General procedure for asymmetric hydrogenation of acids 1 using iridium complexes of 2 as the catalysts.** To a test tube were charged with a stir bar, acid (0.1 mmol), the catalyst Ir(I)/2 (0.001 mmol), base (0.1 mmol) and 1mL MeOH under Ar atmosphere. The test tube was placed in a Parr steel autoclave in a glove box, which was purged three times with hydrogen and finally pressurized to 10 or 30 atm. The reaction mixture was stirred for 20 h at 30-50°C. Then the hydrogen gas was released and the conversion was determined by <sup>1</sup>H NMR. The reaction mixture was then treated with CH<sub>2</sub>N<sub>2</sub> in ether for 2 h. After a flash column chromatography separation on silica gel with EtOAc as eluent, the desired methyl ester was obtained. The ee value of the product was determined by chiral HPLC using its methyl ester derivative.

### Characterization data for product corresponding derivatives 3a-l

#### (-)-Methyl 2-phenyl-3-(tetrahydro-2H-pyran-4-yl)propanoate (3a)

pale yellow oil, 96% ee,  $[\alpha]_D^{20} = -44.4^\circ$  (*c* 1.16, CHCl<sub>3</sub>); <sup>1</sup>H NMR (400 MHz, CDCl<sub>3</sub>)  $\delta = 7.34-7.24$  (m, 5H), 3.93-3.90 (m, 2H), 3.70-3.65 (m, 4H), 3.29 (t, *J* = 11.2 Hz, 2H), 2.07-2.00 (m, 1H), 1.77-1.56 (m, 4H), 1.40-1.27 (m, 2H) ppm; <sup>13</sup>C NMR (100 MHz, CDCl<sub>3</sub>)  $\delta = 174.4, 138.9, 128.6, 127.8, 127.2, 67.8, 67.7, 52.0, 48.2, 40.4, 32.9, 32.7, 32.6$  ppm; HRMS-EI (*m/z*) M<sup>+</sup> calcd. for C<sub>15</sub>H<sub>20</sub>O<sub>3</sub>. 248.1412 found 248.1409. HPLC condition for corresponding methyl ester: Chiralcel AD-H column (hexane : isopropanol = 99 : 1, flow rate = 1.0 mL/min, UV detection at  $\lambda = 230$  nm) *t*<sub>R</sub> = 12.0 min (minor), *t*<sub>R</sub> = 15.8 min (major).

#### (R)-Methyl 2-phenylpropanoate(3b)<sup>S5</sup>

pale yellow oil, 88% ee,  $[\alpha]_D^{20} = -15.2^\circ$  (*c* 0.83, CHCl<sub>3</sub>); <sup>1</sup>H NMR (400 MHz, CDCl<sub>3</sub>)  $\delta = 7.34-7.22$  (m, 5H), 3.73 (q, *J* = 7.2 Hz, 1H), 3.65 (s, 3H), 1.50 (d, *J* = 7.2 Hz, 3H) ppm; <sup>13</sup>C NMR (100 MHz, CDCl<sub>3</sub>)  $\delta = 174.9, 140.5, 128.6, 127.4, 127.1, 51.9, 45.3, 18.5$  ppm; HRMS-EI (*m/z*) M<sup>+</sup> calcd. for C<sub>10</sub>H<sub>12</sub>O<sub>2</sub>. 164.0837 found 164.0841. HPLC condition for corresponding methyl ester: Chiralcel OJ column (hexane : isopropanol = 99 : 1, flow rate = 1.0 mL/min, UV detection at  $\lambda = 230$  nm) *t*<sub>R</sub> = 12.8 min (minor), *t*<sub>R</sub> = 16.1 min (major).

#### (R)-Methyl 2-phenylbutanoate(3c)<sup>S6</sup>

pale yellow oil, 94% ee,  $[\alpha]_D^{20} = -38.8^\circ$  (*c* 1.64, CHCl<sub>3</sub>); <sup>1</sup>H NMR (400 MHz, CDCl<sub>3</sub>)  $\delta = 7.33-7.23$  (m, 5H), 3.65 (s, 3H), 3.45(t, *J* = 7.6 Hz, 1H), 2.13-2.06 (m, 1H), 1.83-1.76 (m, 1H), 0.89 (t, *J* = 6.4 Hz, 3H) ppm; <sup>13</sup>C NMR (100 MHz, CDCl<sub>3</sub>)  $\delta = 174.5, 139.0, 128.5, 127.9, 127.1, 53.3, 51.8, 26.7, 12.1$  ppm; HRMS-EI (*m/z*) M<sup>+</sup> calcd. for C<sub>11</sub>H<sub>14</sub>O<sub>2</sub>. 178.0994 found 178.0996. HPLC condition for corresponding methyl ester: Chiralcel OD-H column (hexane : isopropanol = 99 : 1, flow rate = 1.0 mL/min, UV detection at  $\lambda = 230$  nm) *t*<sub>R</sub> = 5.3 min (major), *t*<sub>R</sub> = 5.9 min (minor).

#### (R)-Methyl 2,3-diphenylpropanoate (3d)<sup>S7</sup>

pale yellow oil, 94% ee,  $[\alpha]_D^{20} = -53.3^\circ$  (*c* 1.17, CHCl<sub>3</sub>); <sup>1</sup>H NMR (400 MHz, CDCl<sub>3</sub>)  $\delta = 7.30-7.10$  (m, 10H), 3.87-3.81 (m, 1H), 3.59 (s, 3H), 3.44-3.38 (m, 1H), 3.02 (dd, *J* = 6.8 Hz, *J* = 13.6 Hz, 1H) ppm; <sup>13</sup>C NMR (100 MHz, CDCl<sub>3</sub>)  $\delta = 173.8, 139.0, 138.6, 128.8, 128.6, 128.3, 127.9, 127.3, 126.3, 53.5, 51.9, 39.7$  ppm; HRMS-EI (*m/z*) M<sup>+</sup> calcd. for C<sub>16</sub>H<sub>16</sub>O<sub>2</sub>. 240.1150 found 240.1153. HPLC condition for corresponding methyl ester:

Chiralcel OD-H column (hexane : isopropanol = 99 : 1, flow rate = 1.0 mL/min, UV detection at  $\lambda = 230$  nm)  $t_R = 7.0$  min (major),  $t_R = 7.9$  min (minor).

**(-)-Methyl 3-cyclopentyl-2-phenylpropanoate (3e)**<sup>S9</sup>

pale yellow oil, 95% ee,  $[\alpha]_D^{20} = -41.1^\circ$  (*c* 1.23, CHCl<sub>3</sub>); <sup>1</sup>H NMR (400 MHz, CDCl<sub>3</sub>)  $\delta = 7.32-7.25$  (m, 5H), 3.64 (s, 3H), 3.60 (t, *J* = 10.4 Hz, 1H), 2.09-2.02 (m, 1H), 1.82-1.43 (m, 8H), 1.12-1.07 (m, 2H) ppm; <sup>13</sup>C NMR (100 MHz, CDCl<sub>3</sub>)  $\delta = 174.7, 139.3, 128.5, 127.9, 127.1, 51.9, 50.7, 39.8, 37.8, 32.6, 32.2, 25.0$  ppm; HRMS-EI (*m/z*) M<sup>+</sup> calcd. for C<sub>15</sub>H<sub>20</sub>O<sub>2</sub>. 232.1463 found 232.1461. HPLC condition for corresponding methyl ester: Chiralcel OJ-H column (hexane : isopropanol = 90 : 10, flow rate = 0.7 mL/min, UV detection at  $\lambda = 230$  nm)  $t_R = 8.4$  min (major),  $t_R = 8.8$  min (minor).

**(-)-Methyl 2-(4-methoxyphenyl)-3-(tetrahydro-2H-pyran-4-yl)propanoate (3f)**

pale yellow oil, 95% ee,  $[\alpha]_D^{20} = -43.0^\circ$  (*c* 0.76, CHCl<sub>3</sub>); <sup>1</sup>H NMR (400 MHz, CDCl<sub>3</sub>)  $\delta = 7.21$  (d, *J* = 8.4 Hz, 2H), 6.85 (d, *J* = 8.4 Hz, 2H), 3.92-3.89 (m, 2H), 3.79 (s, 3H), 3.64-3.61 (m, 4H), 3.29 (t, *J* = 11.6 Hz, 2H), 2.03-1.96 (m, 1H), 1.74-1.55 (m, 4H), 1.41-1.25 (m, 2H) ppm; <sup>13</sup>C NMR (100 MHz, CDCl<sub>3</sub>)  $\delta = 174.7, 158.8, 130.9, 128.8, 114.0, 67.8, 67.7, 55.2, 51.9, 47.3, 40.4, 33.0, 32.6, 32.6$  ppm; HRMS-EI (*m/z*) M<sup>+</sup> calcd. for C<sub>16</sub>H<sub>22</sub>O<sub>4</sub>. 278.1518 found 278.1520. HPLC condition for corresponding methyl ester: Chiralcel AD-H column (hexane : isopropanol = 92 : 8, flow rate = 0.7 mL/min, UV detection at  $\lambda = 230$  nm)  $t_R = 9.8$  min (minor),  $t_R = 11.8$  min (major).

**(-)-Methyl 2-(4-fluorophenyl)-3-(tetrahydro-2H-pyran-4-yl)propanoate (3g)**

pale yellow oil, 95% ee,  $[\alpha]_D^{20} = -38.7^\circ$  (*c* 0.62, CHCl<sub>3</sub>); <sup>1</sup>H NMR (400 MHz, CDCl<sub>3</sub>)  $\delta = 7.28-7.25$  (m, 2H), 7.01 (t, *J* = 8.4 Hz, 2H), 3.93-3.90 (m, 2H), 3.69-3.65 (m, 4H), 3.29 (t, *J* = 12.0 Hz, 2H), 2.05-1.97 (m, 1H), 1.73-1.55 (m, 4H), 1.41-1.24 (m, 2H) ppm; <sup>13</sup>C NMR (100 MHz, CDCl<sub>3</sub>)  $\delta = 174.3, 162.0$  (d, *J* = 244.2 Hz), 134.6, 129.3 (d, *J* = 8.3 Hz), 115.5 (d, *J* = 21.2 Hz), 67.7, 67.7, 52.0, 47.5, 40.5, 32.9, 32.6 ppm; HRMS-EI (*m/z*) M<sup>+</sup> calcd. for C<sub>15</sub>H<sub>19</sub>O<sub>3</sub>F. 266.1318 found 266.1319. HPLC condition for corresponding methyl ester: Chiralcel AD-H column (hexane : isopropanol = 99 : 1, flow rate = 1.0 mL/min, UV detection at  $\lambda = 230$  nm)  $t_R = 12.4$  min (minor),  $t_R = 15.9$  min (major).

**(-)-Methyl 2-(4-iodophenyl)-3-(tetrahydro-2H-pyran-4-yl)propanoate (3h)**

yellow solid, M.p. = 61-63 °C; 91% ee,  $[\alpha]_D^{20} = -39.5^\circ$  (*c* 1.05, CHCl<sub>3</sub>); <sup>1</sup>H NMR (400 MHz, CDCl<sub>3</sub>)  $\delta = 7.65$  (d, *J* = 8.4 Hz, 2H), 7.05 (d, *J* = 8.4 Hz, 2H), 3.92-3.89 (m, 2H), 3.65-3.61 (m, 4H), 3.29 (t, *J* = 11.6 Hz, 2H), 2.03-1.96 (m, 1H), 1.73-1.54 (m, 4H), 1.43-1.25 (m, 2H) ppm; <sup>13</sup>C NMR (100 MHz, CDCl<sub>3</sub>)  $\delta = 173.9, 138.5, 137.7, 129.8, 92.8, 67.7, 67.7, 52.1, 47.8, 40.2, 32.9, 32.5$  ppm; HRMS-EI (*m/z*) M<sup>+</sup> calcd. for C<sub>15</sub>H<sub>19</sub>O<sub>3</sub>I. 374.0379 found 374.0375. HPLC condition for corresponding dehalogenated methyl ester: Chiralcel AD-H column (hexane : isopropanol = 99 : 1, flow rate = 1.0 mL/min, UV detection at  $\lambda = 230$  nm)  $t_R = 9.8$  min (minor),  $t_R = 12.0$  min (major).

**(R)-Methyl 2-(4-(methylsulfonyl)phenyl)-3-(tetrahydro-2H-pyran-4-yl)propanoate (3i)**<sup>S8</sup>

white solid, M.p. = 143-145 °C; 91% ee,  $[\alpha]_D^{20} = -41.1^\circ$  (*c* 0.87, CHCl<sub>3</sub>); <sup>1</sup>H NMR (400 MHz, CDCl<sub>3</sub>)  $\delta = 7.91$  (d, *J* = 8.0 Hz, 2H), 7.52 (d, *J* = 8.0 Hz, 2H), 3.94-3.91 (m, 2H),



3.62-3.78 (m, 1H), 3.68 (s, 3H), 3.30 (t,  $J = 11.2$  Hz, 2H), 3.06 (s, 3H), 2.10-2.05 (m, 1H), 1.77-1.72 (m, 2H), 1.60-1.58 (m, 2H), 1.40-1.25 (m, 2H) ppm;  $^{13}\text{C}$  NMR (100 MHz,  $\text{CDCl}_3$ )  $\delta = 173.3, 145.1, 139.5, 128.9, 127.8, 67.6, 67.6, 52.3, 48.2, 44.4, 40.3, 32.8, 32.6, 32.5$  ppm; HRMS-EI (m/z)  $\text{M}^+$  calcd. for  $\text{C}_{16}\text{H}_{22}\text{O}_5\text{S}$ . 326.1188 found 326.1186. HPLC condition for corresponding methyl ester: Chiralcel OD-H column (hexane : isopropanol = 80 : 20, flow rate = 1.0 mL/min, UV detection at  $\lambda = 230$  nm)  $t_{\text{R}} = 24.4$  min (minor),  $t_{\text{R}} = 27.8$  min (major).

**(R)-Methyl 2-(4-(cyclopropylsulfonyl)phenyl)-3-(tetrahydro-2H-pyran-4-yl)propanoate (3j)**<sup>S8</sup>

yellow solid, M.p. = 54-56 °C; 89% ee,  $[\alpha]_{\text{D}}^{20} = -28.1^\circ$  ( $c$  0.40,  $\text{CHCl}_3$ );  $^1\text{H}$  NMR (400 MHz,  $\text{CDCl}_3$ )  $\delta = 7.86$  (d,  $J = 8.0$  Hz, 2H), 7.50 (d,  $J = 8.0$  Hz, 2H), 3.94-3.91 (m, 2H), 3.79 (t,  $J = 8.0$  Hz, 1H), 3.68 (s, 3H), 3.30 (t,  $J = 12.6$  Hz, 2H), 2.48-2.44 (m, 1H), 2.12-2.04 (m, 1H), 1.77-1.58 (m, 6H), 1.06-1.02 (m, 2H), 0.88-0.82 (m, 2H) ppm;  $^{13}\text{C}$  NMR (100 MHz,  $\text{CDCl}_3$ )  $\delta = 173.4, 144.7, 139.7, 128.8, 128.0, 67.7, 67.6, 52.3, 48.2, 40.4, 32.8, 32.7, 32.6, 29.6, 5.9$  ppm; HRMS-EI (m/z)  $\text{M}^+$  calcd. for  $\text{C}_{18}\text{H}_{24}\text{O}_5\text{S}$ . 352.1344 found 352.1349. HPLC condition for corresponding methyl ester: Chiralcel OD-H column (hexane : isopropanol = 80 : 20, flow rate = 0.7 mL/min, UV detection at  $\lambda = 230$  nm)  $t_{\text{R}} = 32.8$  min (minor),  $t_{\text{R}} = 36.1$  min (major).

**(-)-Methyl 2-(4-(methylthio)phenyl)-3-(tetrahydro-2H-pyran-4-yl)propanoate (3k)**

yellow solid, M.p. = 79-81 °C; 94% ee,  $[\alpha]_{\text{D}}^{20} = -32.4^\circ$  ( $c$  0.45,  $\text{CHCl}_3$ );  $^1\text{H}$  NMR (400 MHz,  $\text{CDCl}_3$ )  $\delta = 7.21$  (s, 4H), 3.92-3.90 (m, 2H), 3.66-3.62 (m, 4H), 3.29 (t,  $J = 11.6$  Hz, 2H), 2.47 (s, 3H), 2.03-1.96 (m, 1H), 1.75-1.55 (m, 3H), 1.41-1.21 (m, 3H) ppm;  $^{13}\text{C}$  NMR (100 MHz,  $\text{CDCl}_3$ )  $\delta = 174.3, 137.4, 135.6, 128.3, 126.8, 67.8, 67.7, 52.0, 47.7, 40.3, 33.0, 32.6, 32.6, 15.7$  ppm; HRMS-EI (m/z)  $\text{M}^+$  calcd. for  $\text{C}_{16}\text{H}_{22}\text{O}_3\text{S}$ . 294.1290 found 294.1294. HPLC condition for corresponding sulfone methyl ester after oxidation with *m*CPBA: Chiralcel AD-H column (hexane : isopropanol = 80 : 20, flow rate = 1.0 mL/min, UV detection at  $\lambda = 230$  nm)  $t_{\text{R}} = 24.5$  min (minor),  $t_{\text{R}} = 28.1$  min (major).

**(R)-Methyl 2-(4-(cyclopropylthio)phenyl)-3-(tetrahydro-2H-pyran-4-yl)propanoate (3l)**<sup>S10</sup>

pale yellow oil, 95% ee,  $[\alpha]_{\text{D}}^{20} = -45.8^\circ$  ( $c$  0.52,  $\text{CHCl}_3$ );  $^1\text{H}$  NMR (400 MHz,  $\text{CDCl}_3$ )  $\delta = 7.31$  (d,  $J = 8.0$  Hz, 2H), 7.21 (d,  $J = 8.0$  Hz, 2H), 3.93-3.90 (m, 2H), 3.65-3.62 (m, 4H), 3.30 (t,  $J = 11.6$  Hz, 2H), 2.19-2.14 (m, 1H), 2.04-1.97 (m, 1H), 1.75-1.68 (m, 1H), 1.60-1.56 (m, 2H), 1.43-1.25 (m, 3H), 1.08-1.05 (m, 2H), 0.69-0.67 (m, 2H) ppm;  $^{13}\text{C}$  NMR (100 MHz,  $\text{CDCl}_3$ )  $\delta = 174.4, 137.9, 135.5, 128.2, 126.6, 67.8, 67.7, 52.0, 47.7, 40.3, 32.9, 32.6, 32.6, 11.9, 8.4$  ppm; HRMS-EI (m/z)  $\text{M}^+$  calcd. for  $\text{C}_{18}\text{H}_{24}\text{O}_3\text{S}$ . 320.1439 found 320.1442. HPLC condition for corresponding sulfone methyl ester after oxidation with *m*CPBA: Chiralcel OD-H column (hexane : isopropanol = 80 : 20, flow rate = 0.7 mL/min, UV detection at  $\lambda = 230$  nm)  $t_{\text{R}} = 26.7$  min (minor),  $t_{\text{R}} = 29.0$  min (major).

Table S1. Optimization of reaction conditions for the asymmetric hydrogenation of acid **1a** catalyzed by Ir(I) complex of (*R,S*)-**2a**<sup>a</sup>

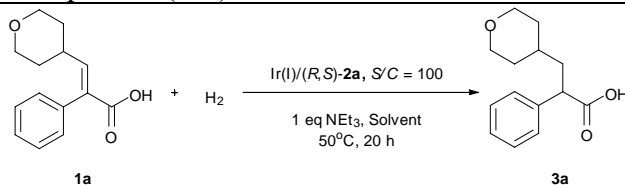

| entry           | Solvent | [sub] (M) | $P_{H_2}$ (atm) | conv. (%) <sup>b</sup> | ee (%) <sup>c</sup> |
|-----------------|---------|-----------|-----------------|------------------------|---------------------|
| 1               | Toluene | 0.1       | 30              | 43                     | 71 (-)              |
| 2               | DCE     | 0.1       | 30              | 41                     | 91 (-)              |
| 3               | THF     | 0.1       | 30              | 87                     | 95 (-)              |
| 4               | EA      | 0.1       | 30              | 35                     | 92 (-)              |
| 5               | MeOH    | 0.1       | 30              | 92                     | 93 (-)              |
| 6               | MeOH    | 0.2       | 30              | 84                     | 93 (-)              |
| 7               | MeOH    | 0.05      | 30              | 92                     | 93 (-)              |
| 8               | EtOH    | 0.1       | 30              | 92                     | 93 (-)              |
| 9               | i-PrOH  | 0.1       | 30              | 92                     | 93 (-)              |
| 10              | MeOH    | 0.1       | 10              | 91                     | 93 (-)              |
| 11 <sup>d</sup> | MeOH    | 0.1       | 30              | 61                     | 92 (-)              |

<sup>a</sup> Reaction condition: 0.1 mmol scale, [substrate] = 0.1 mol L<sup>-1</sup> in solvent, s/c = 100.

<sup>b</sup> Determined by <sup>1</sup>H NMR. <sup>c</sup> Determined by chiral HPLC analysis of the corresponding methyl ester on Chiralcel AD-H column. <sup>d</sup> Reaction temperature is 30°C.

Table S2. Optimization of additives for the asymmetric hydrogenation of acid **1a** catalyzed by Ir(I) complex of (*R,S*)-**2a**<sup>a</sup>

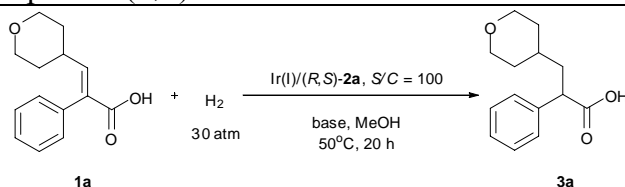

| entry | base                            | [base] (eq.) | conv. (%) <sup>b</sup> | ee (%) <sup>c</sup> |
|-------|---------------------------------|--------------|------------------------|---------------------|
| 1     | Et <sub>3</sub> N               | 1            | 92                     | 93 (-)              |
| 2     | DIPEA                           | 1            | 74                     | 93 (-)              |
| 3     | Pyridine                        | 1            | trace                  | N.D.                |
| 4     | Me <sub>3</sub> N               | 1            | 75                     | 93 (-)              |
| 5     | NaHCO <sub>3</sub>              | 1            | trace                  | N.D.                |
| 6     | K <sub>2</sub> CO <sub>3</sub>  | 1            | trace                  | N.D.                |
| 7     | Cs <sub>2</sub> CO <sub>3</sub> | 1            | trace                  | N.D.                |
| 8     | KOH                             | 1            | 63                     | 92 (-)              |
| 9     | Et <sub>3</sub> N               | 0.5          | 90                     | 93 (-)              |
| 10    | Et <sub>3</sub> N               | 2            | 40                     | 92 (-)              |

<sup>a</sup> Reaction condition: 0.1 mmol scale, [substrate] = 0.1 mol L<sup>-1</sup> in MeOH, s/c = 100.

<sup>b</sup> Determined by <sup>1</sup>H NMR. <sup>c</sup> Determined by chiral HPLC analysis of the corresponding methyl ester on Chiralcel AD-H column.

## NMR data for new compounds

### Ligand (*R,S*)-2f

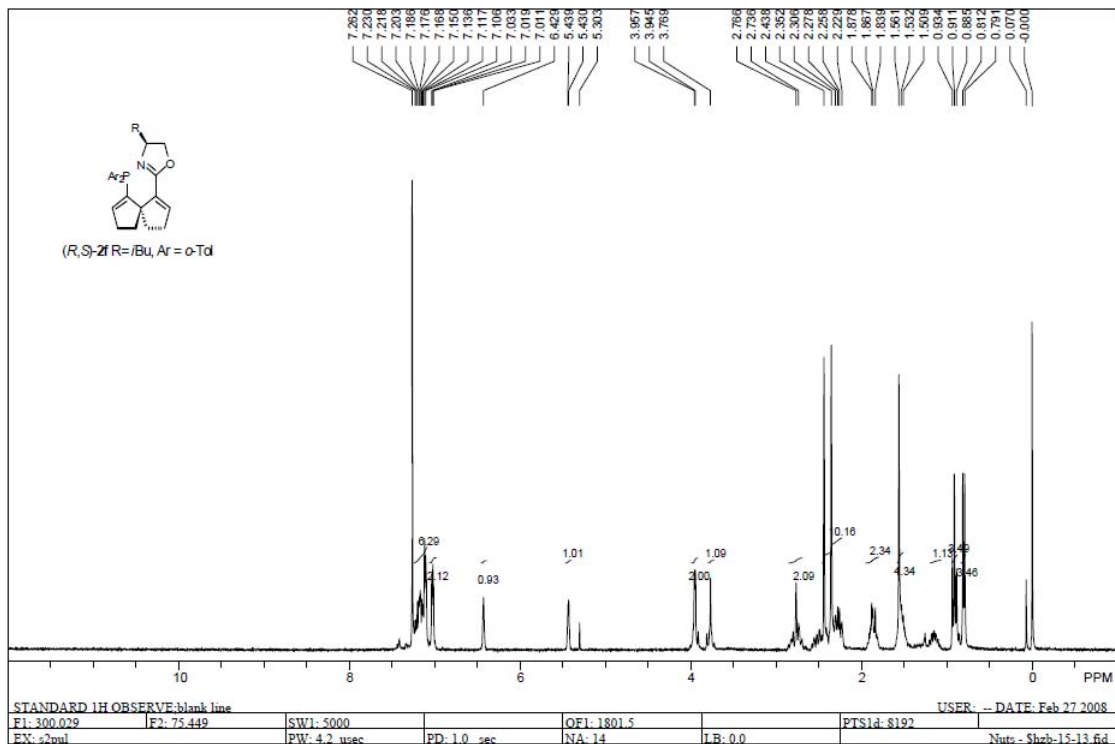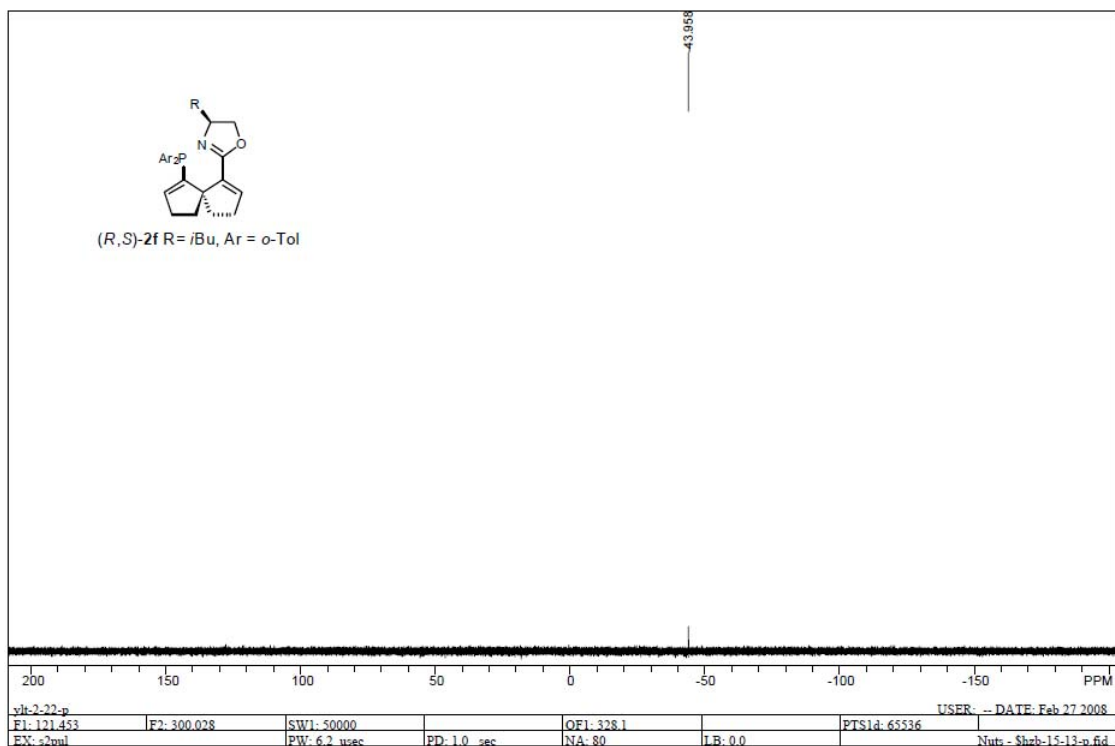

### Ligand (*R,S*)-2g

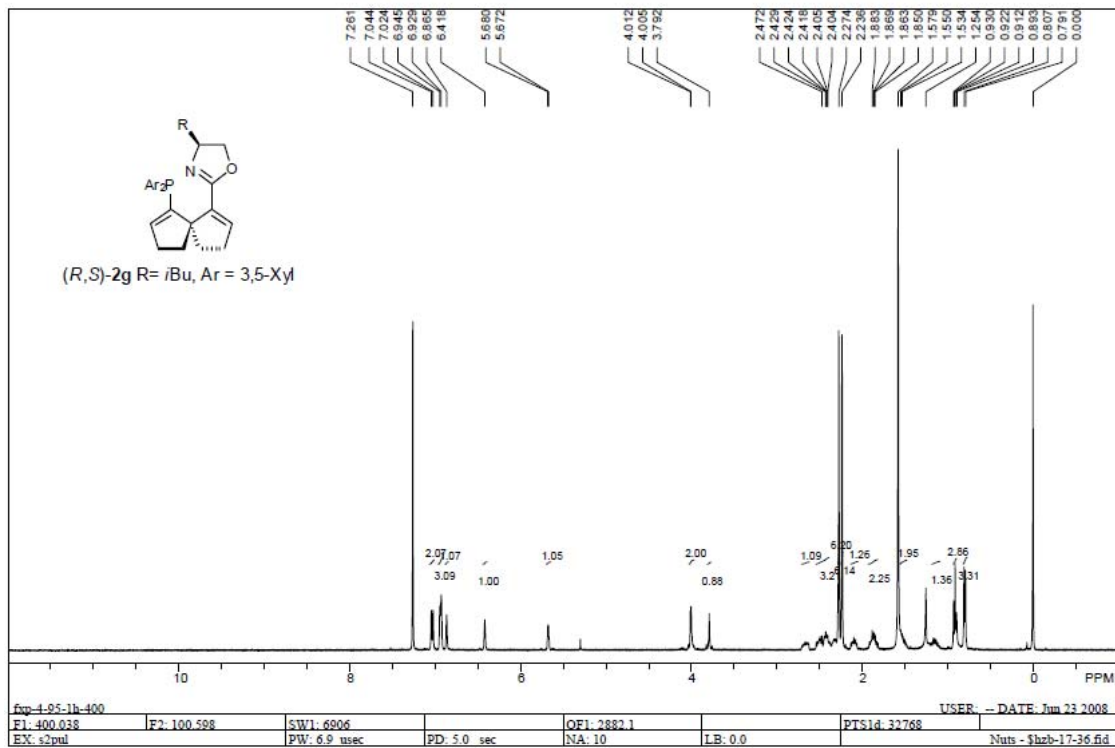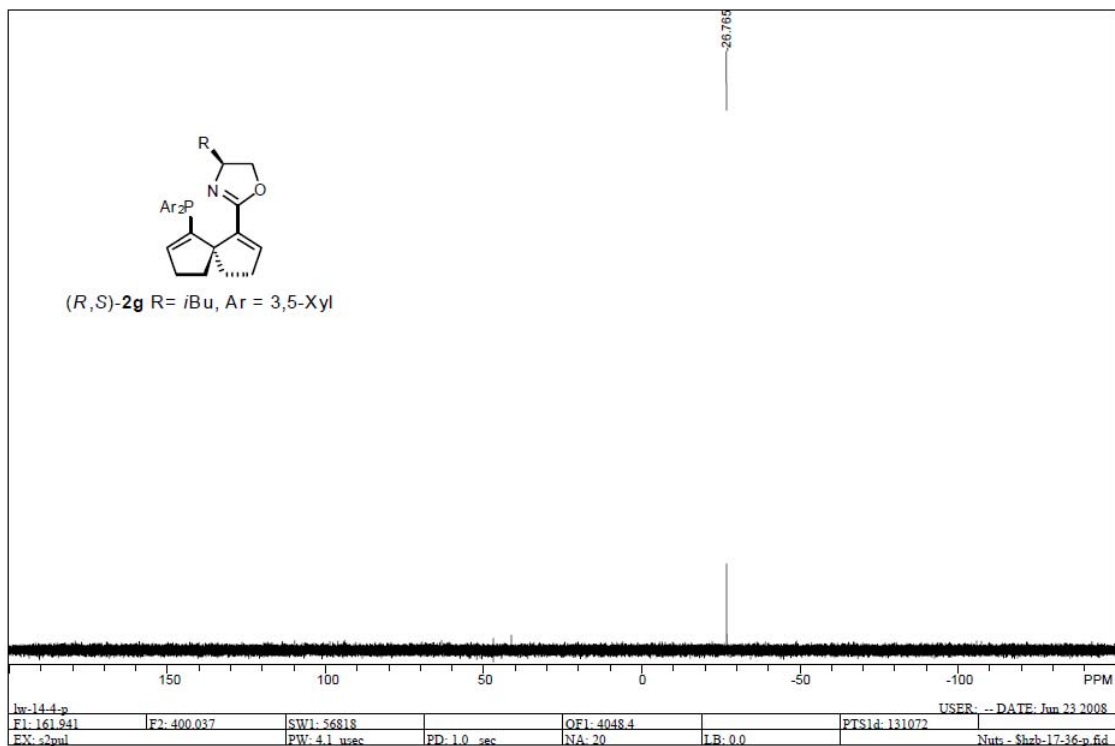

**Ligand (R,S)-2h**

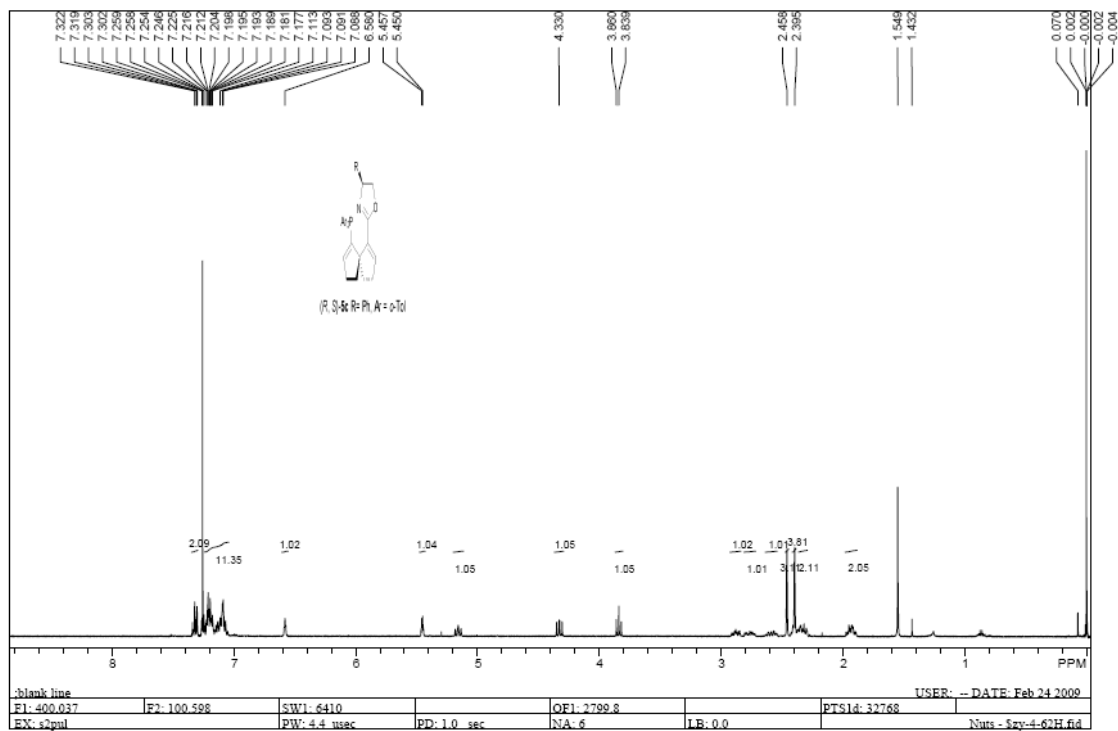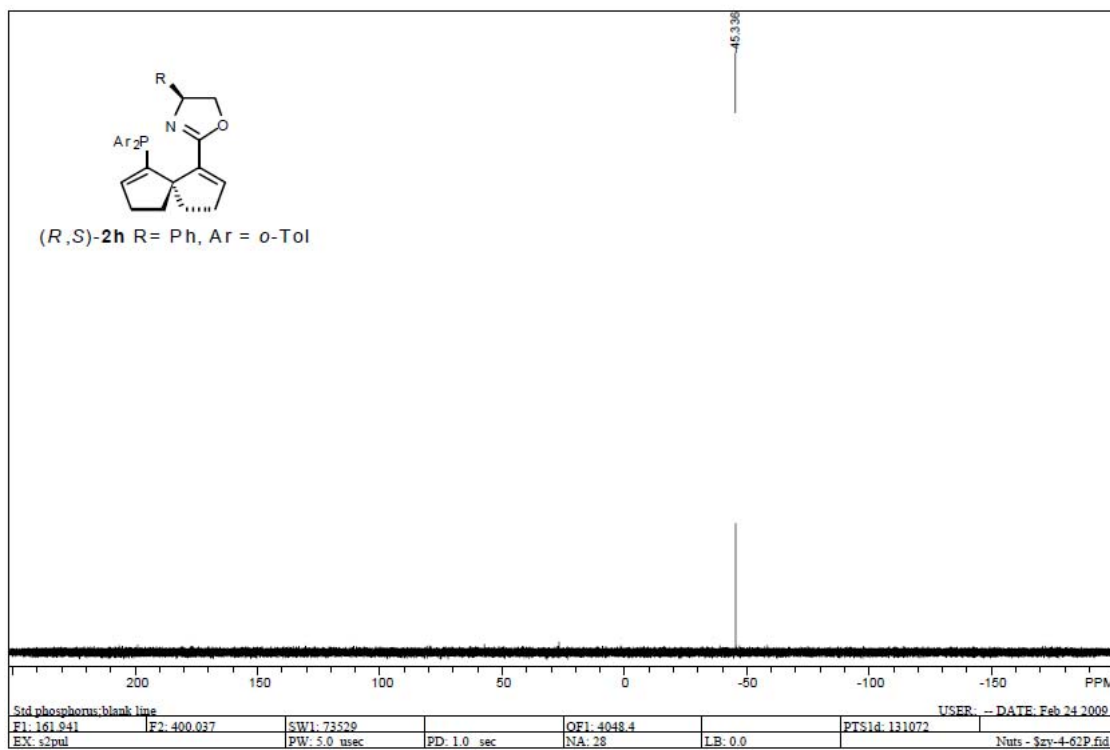

**Ir(I)/(R,S)-2f (R = *i*Bu, Ar = *o*-Tol)**

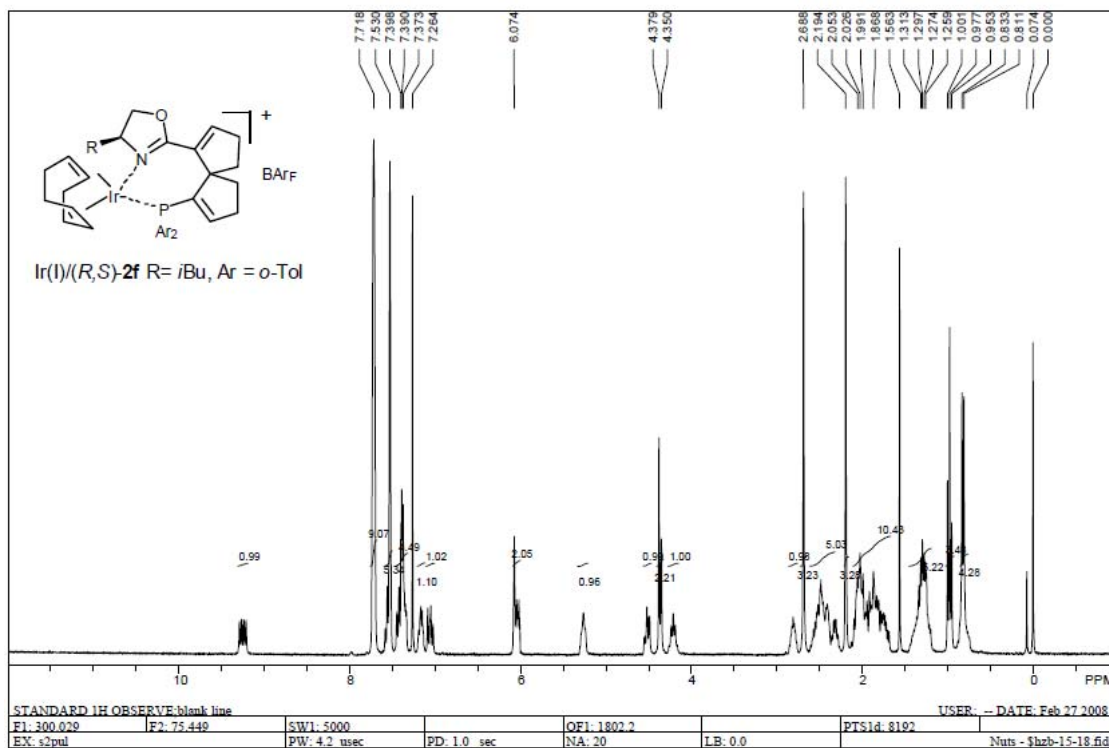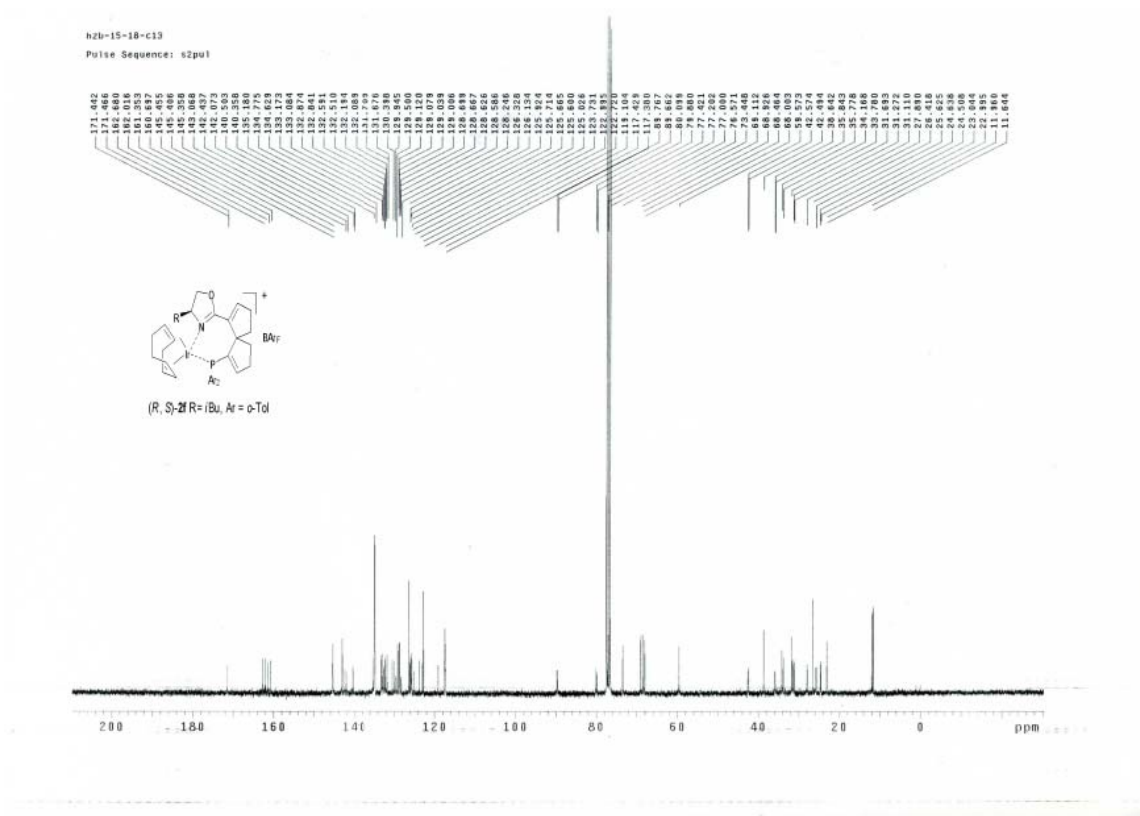

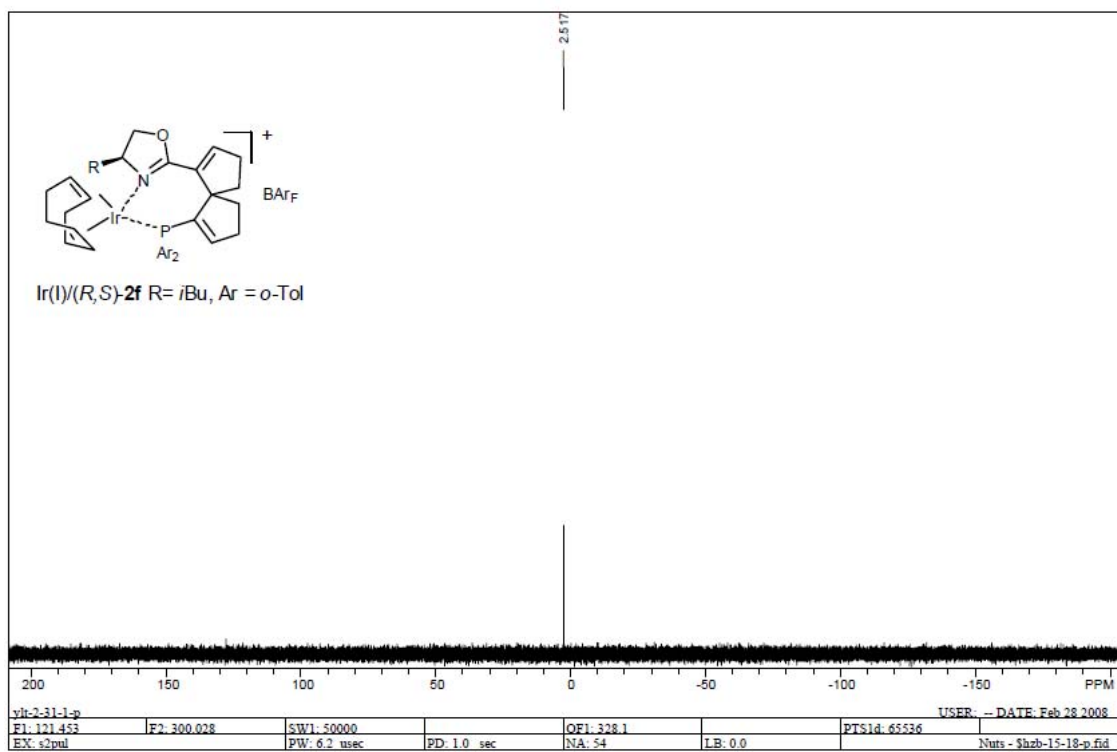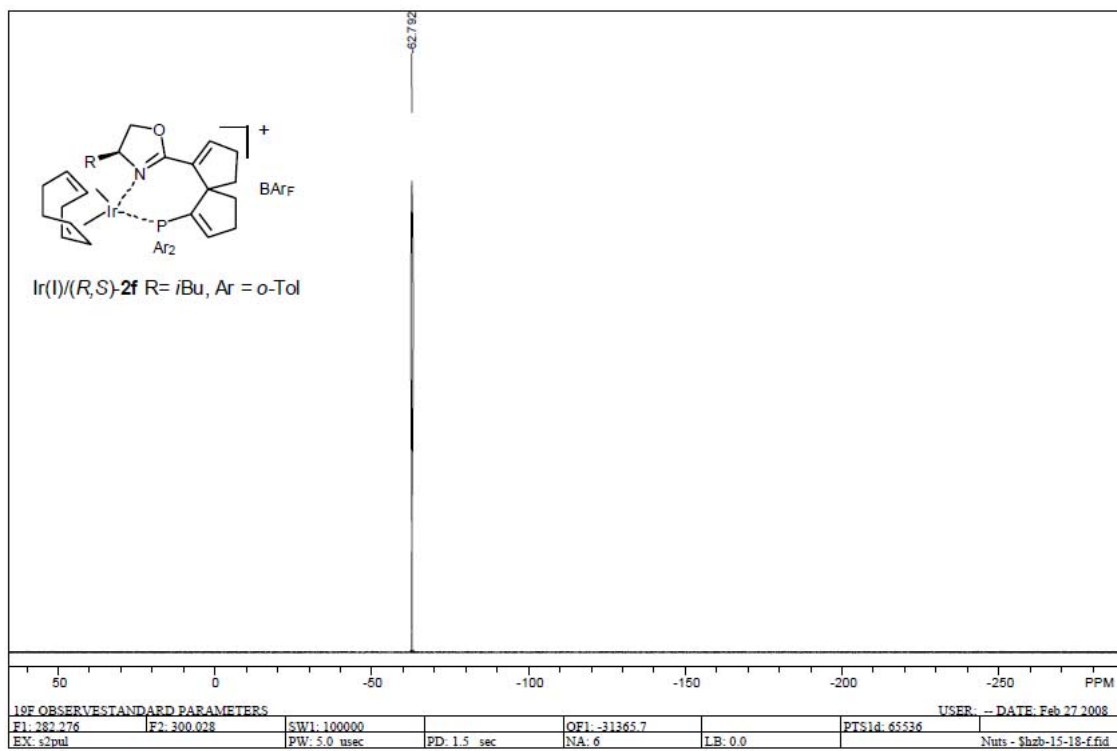

**Ir(I)/(R,S)-2g (R = *i*Bu, Ar = 3,5-Xyl)**

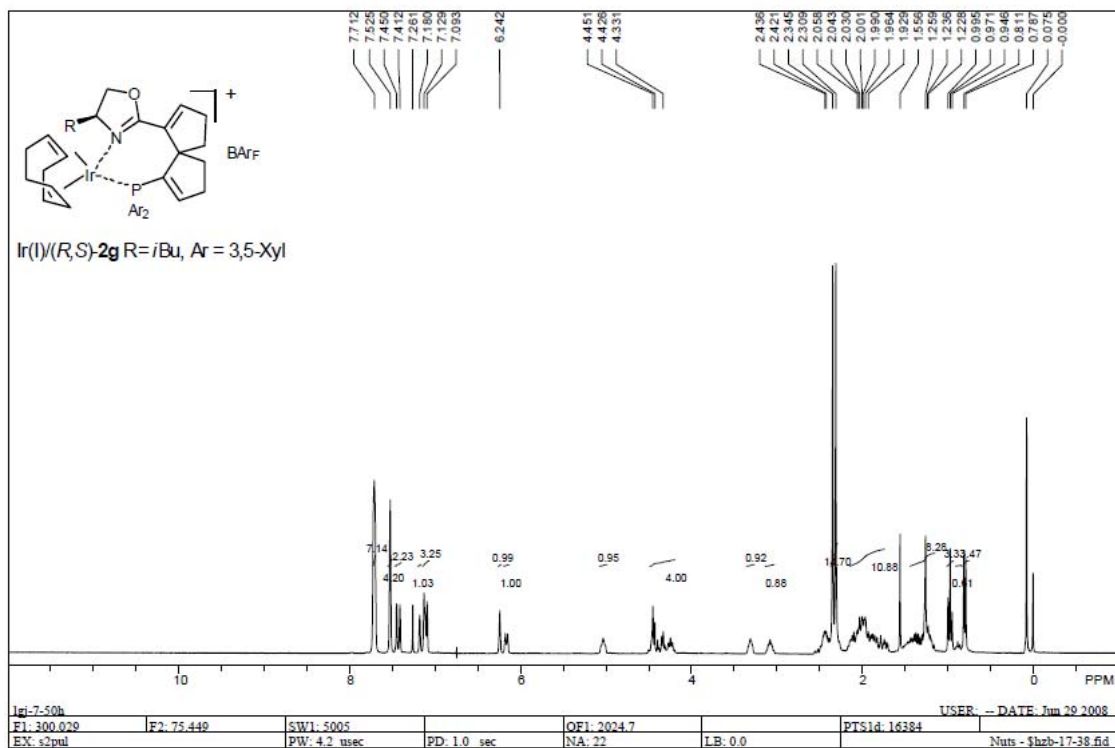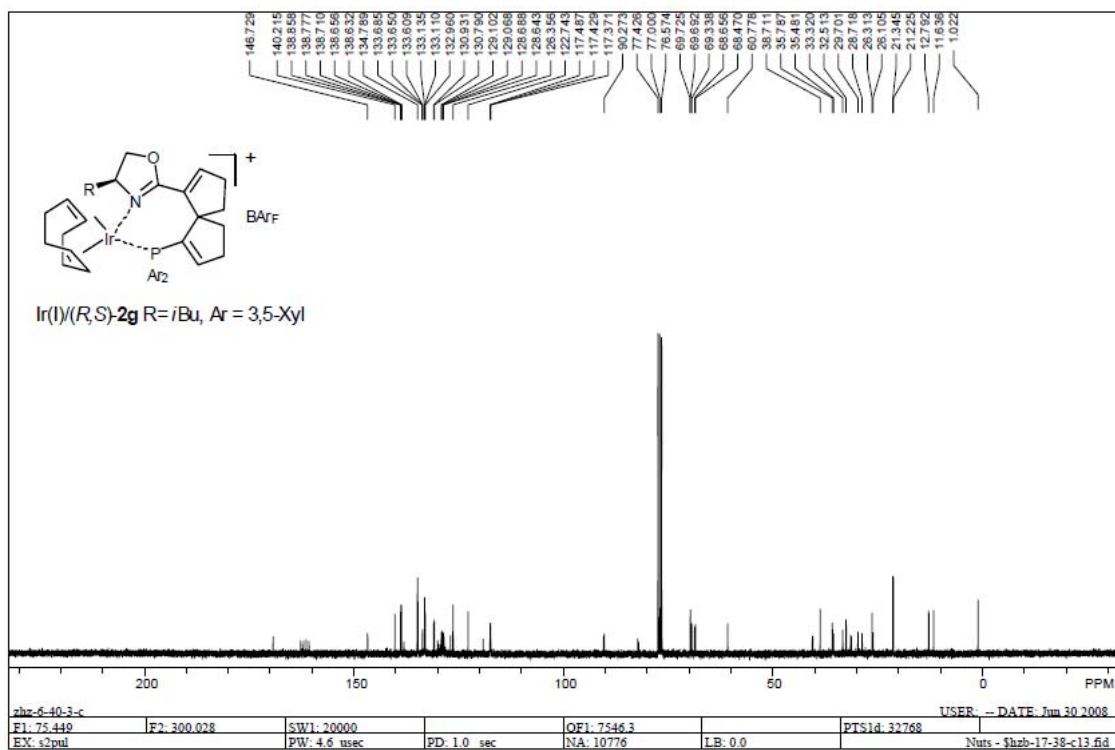



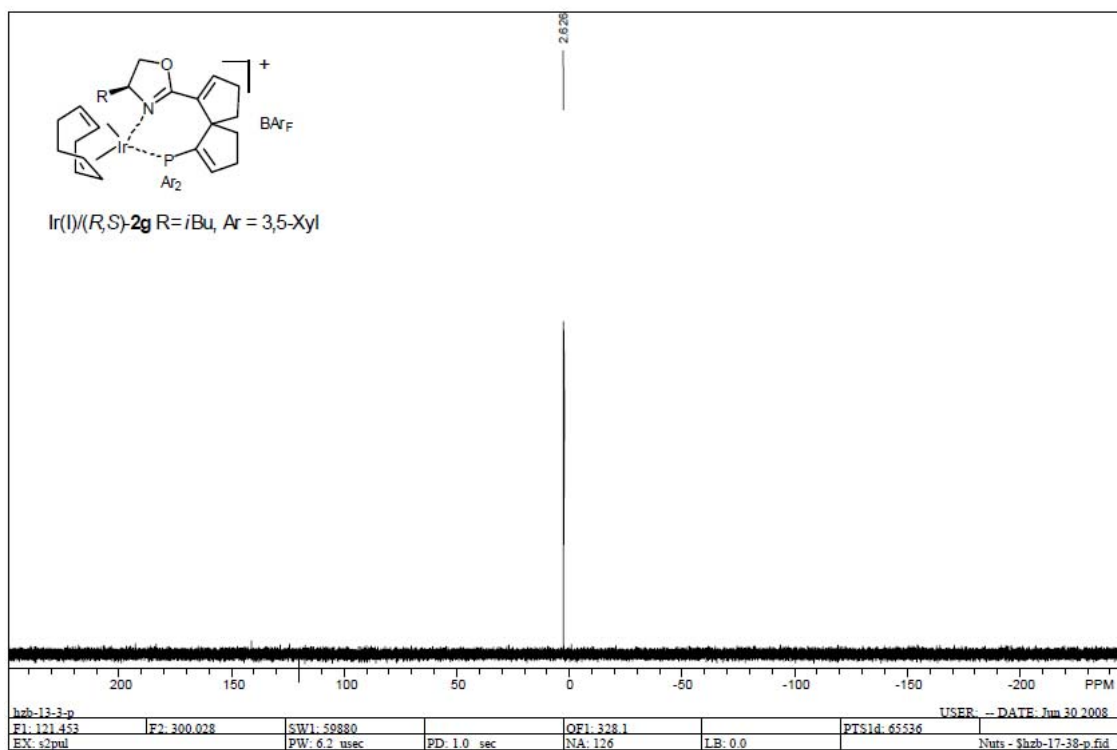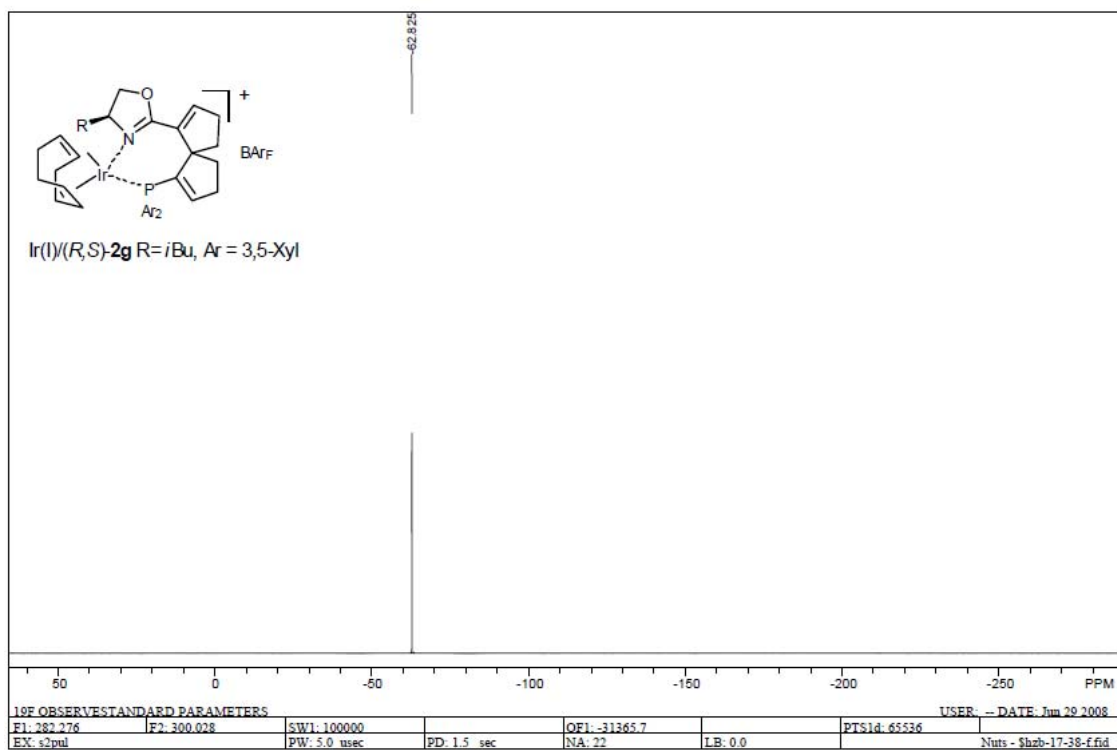

**Ir(I)/(R,S)-2h (R = Ph, Ar = *o*-Tol)**

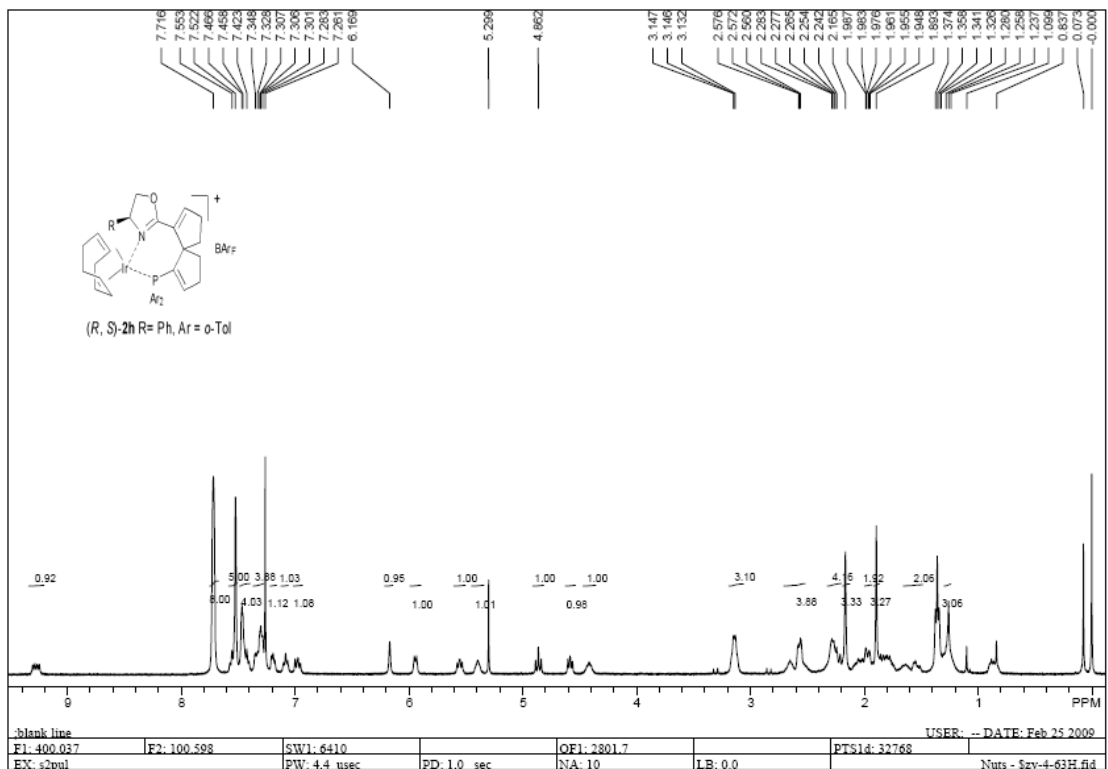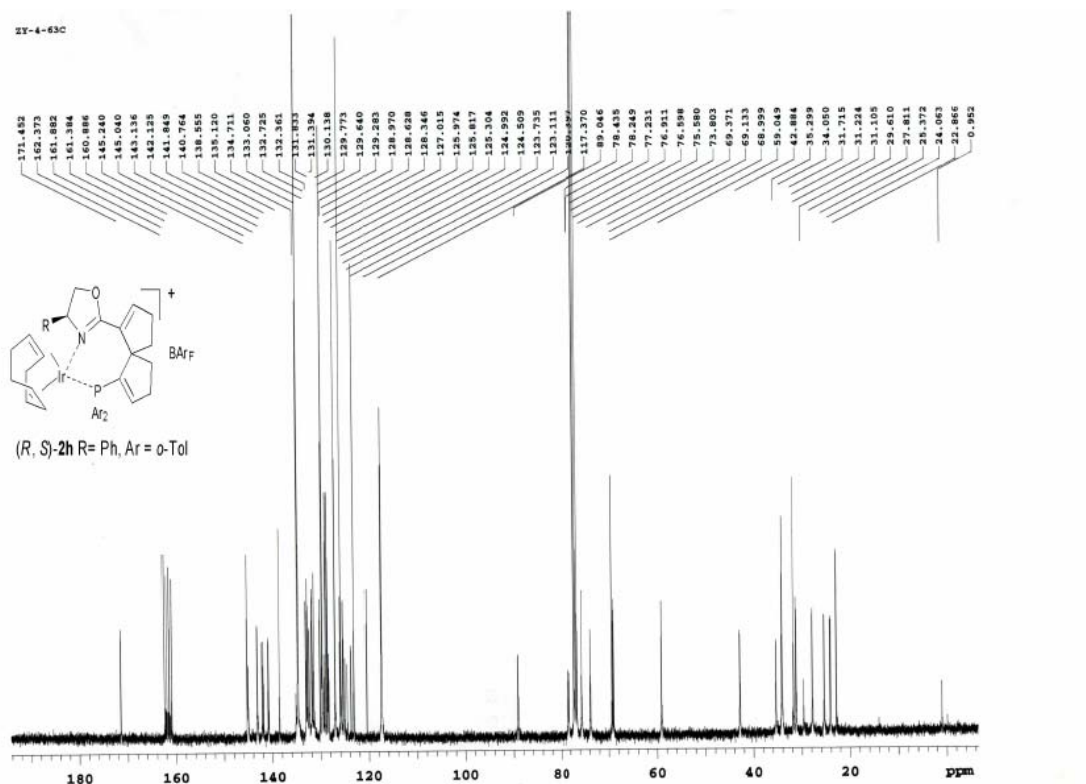

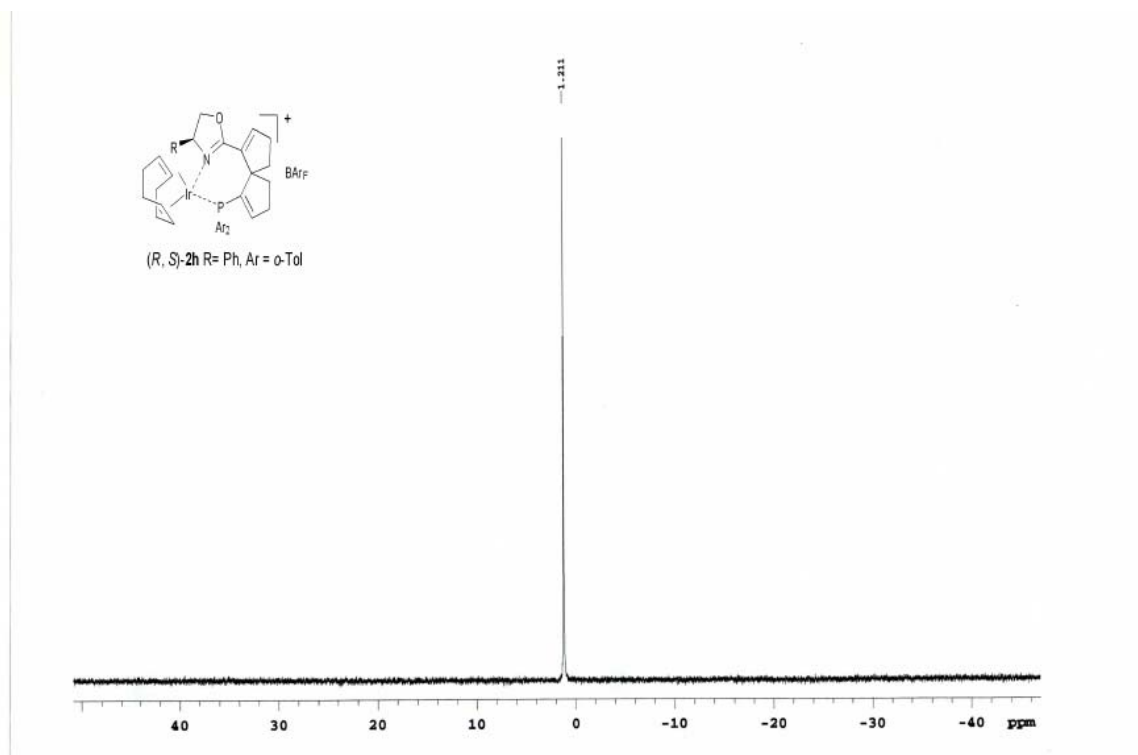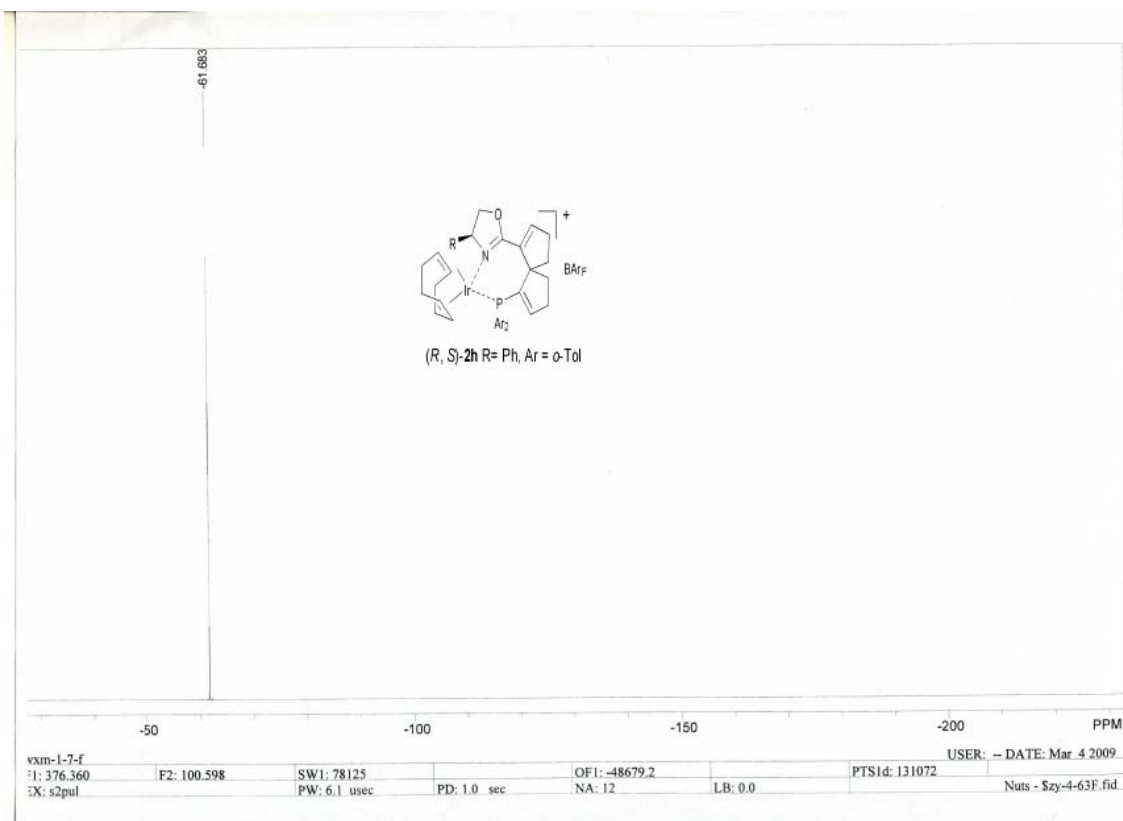

### Compound 1a

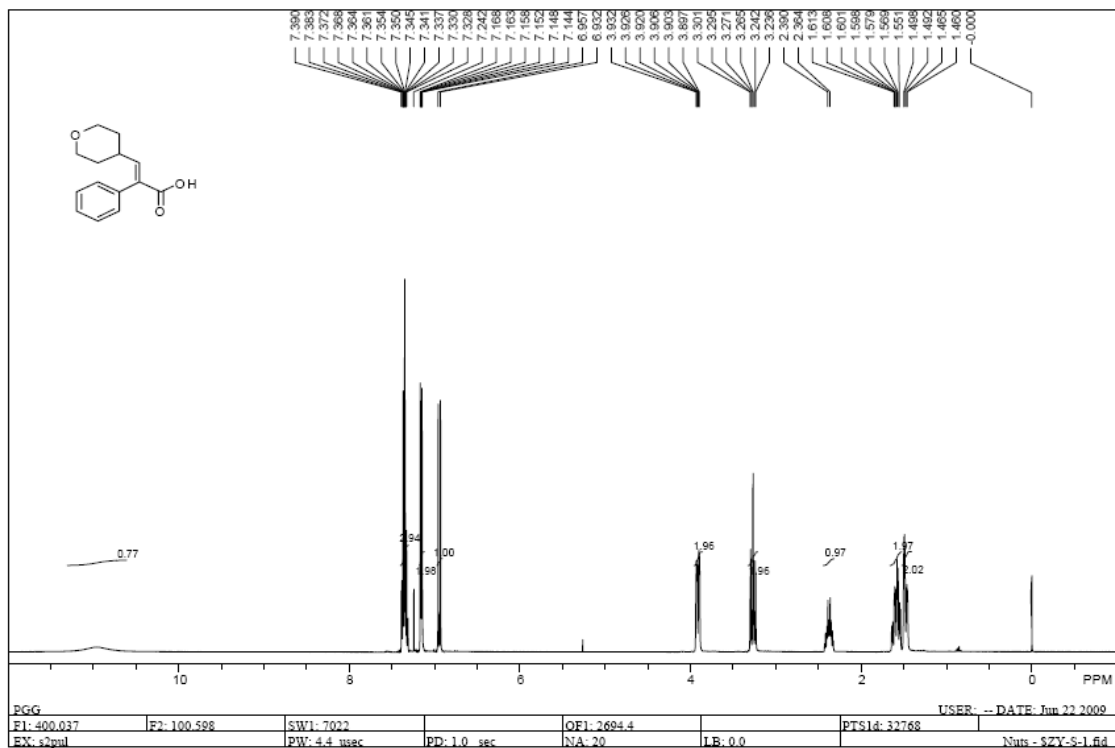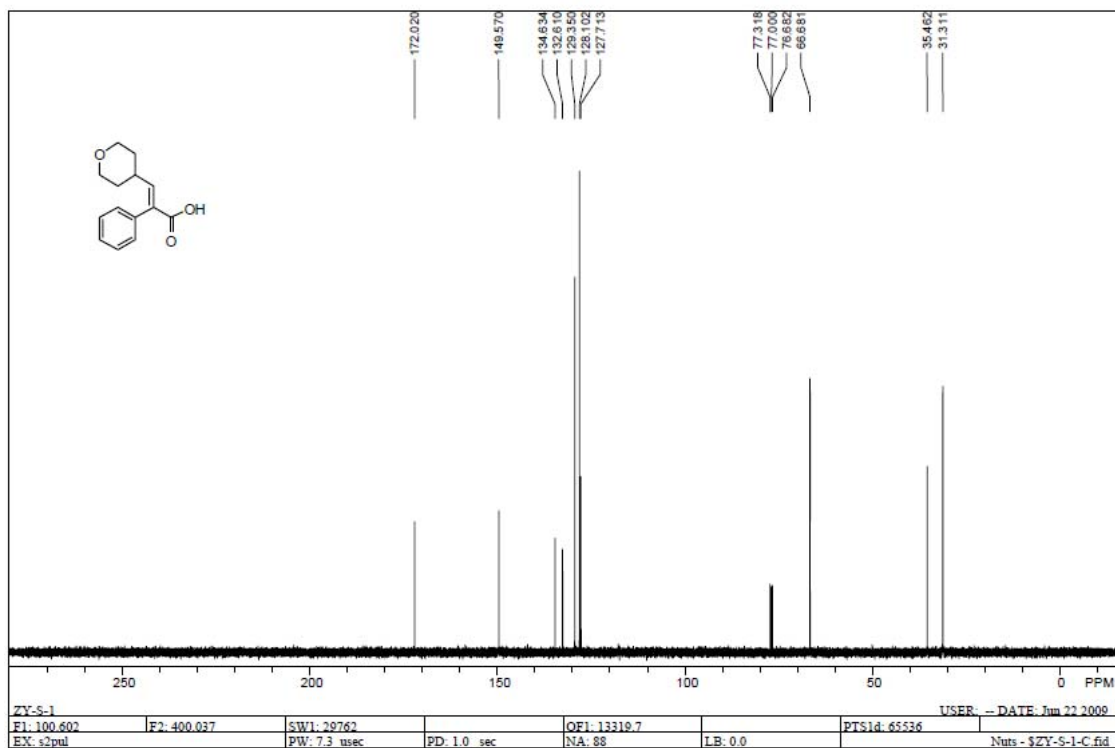

### Compound 1e

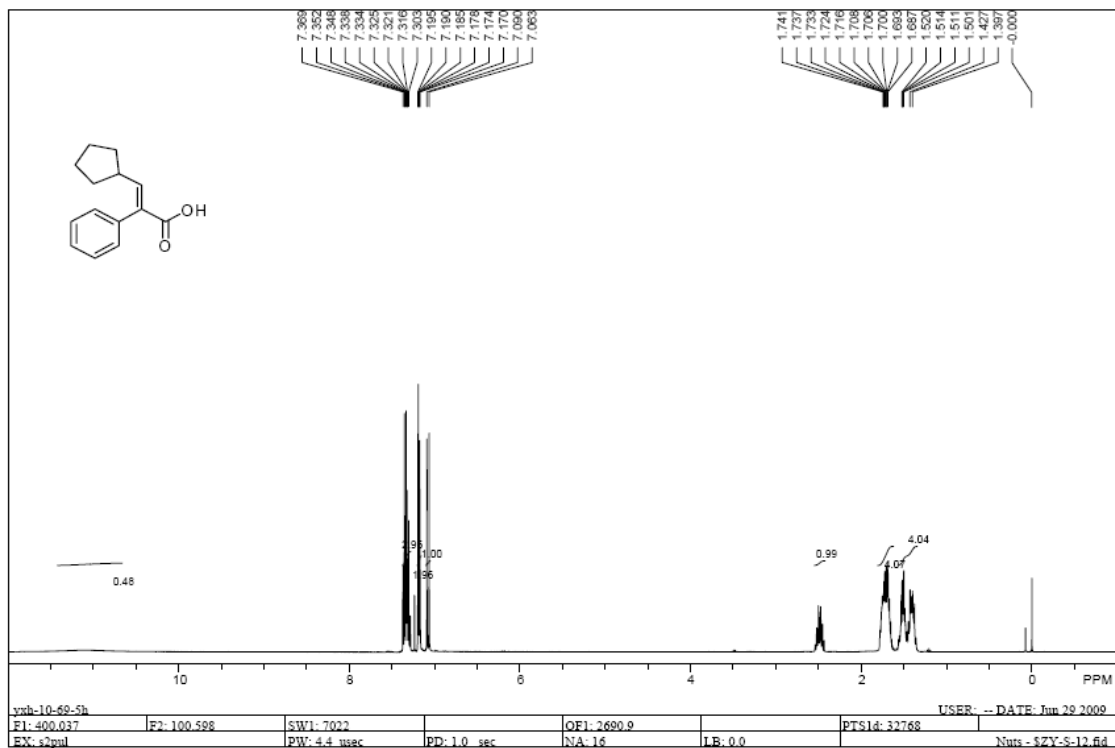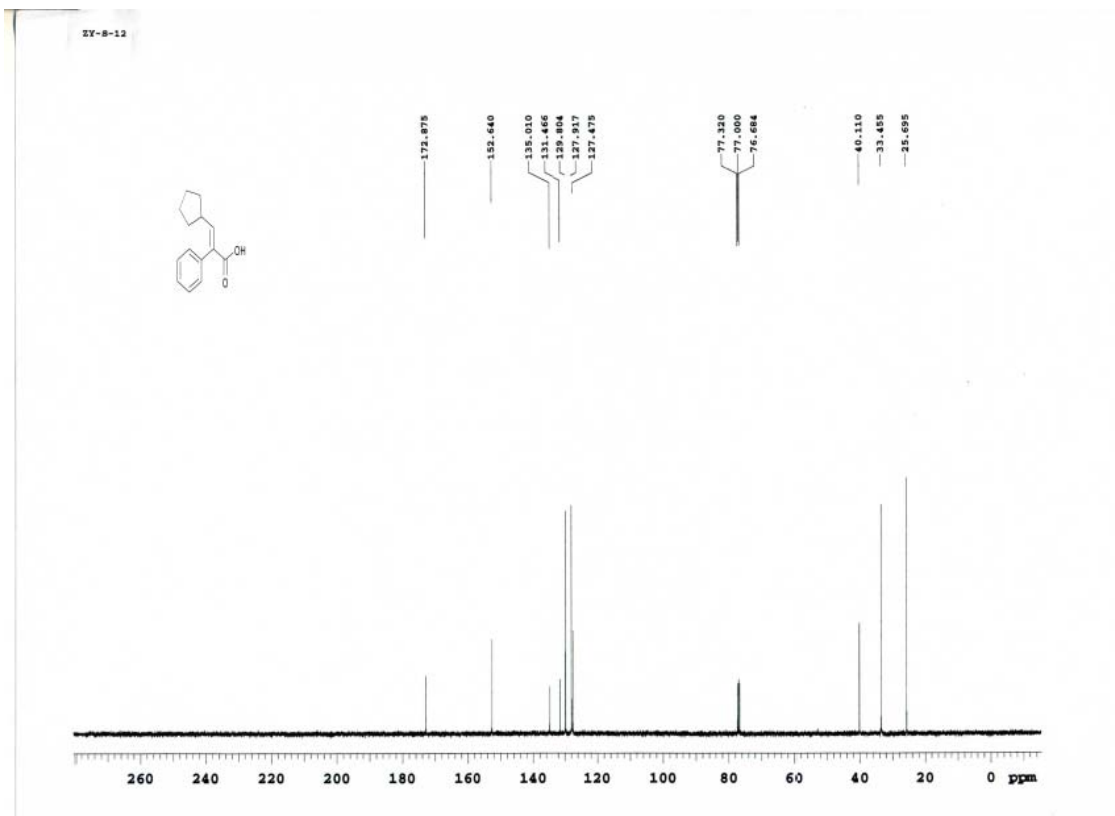

### Compound 1g

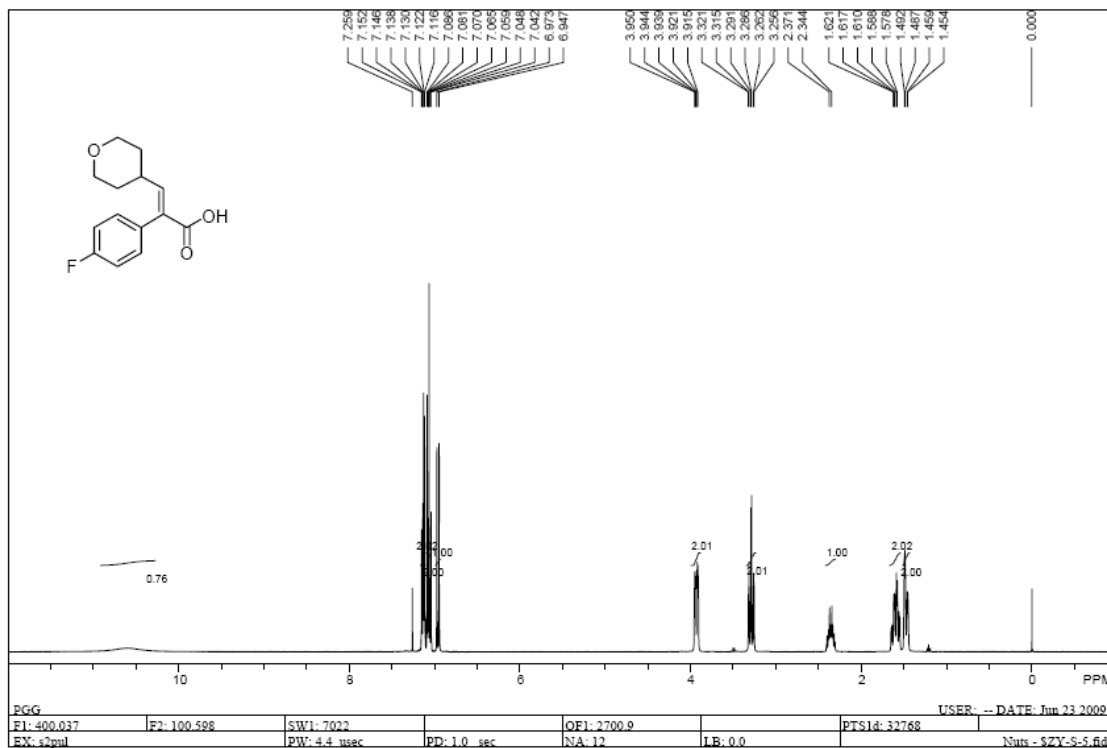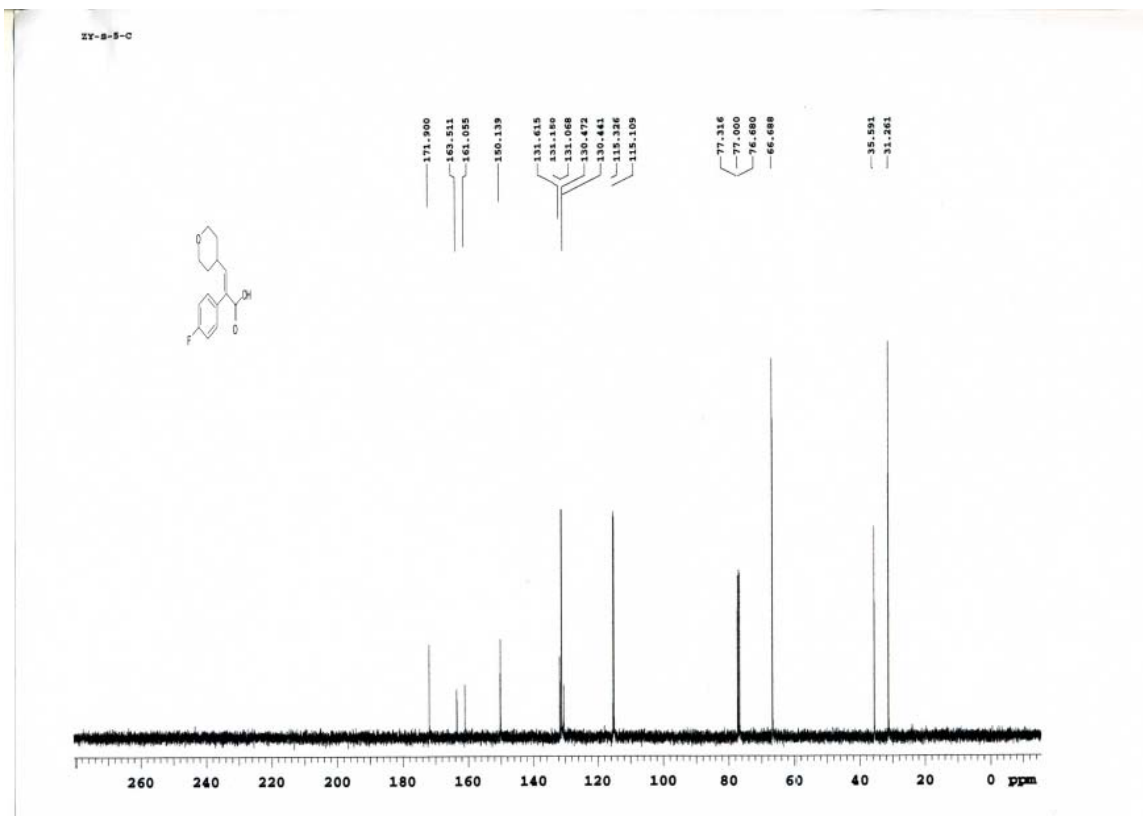

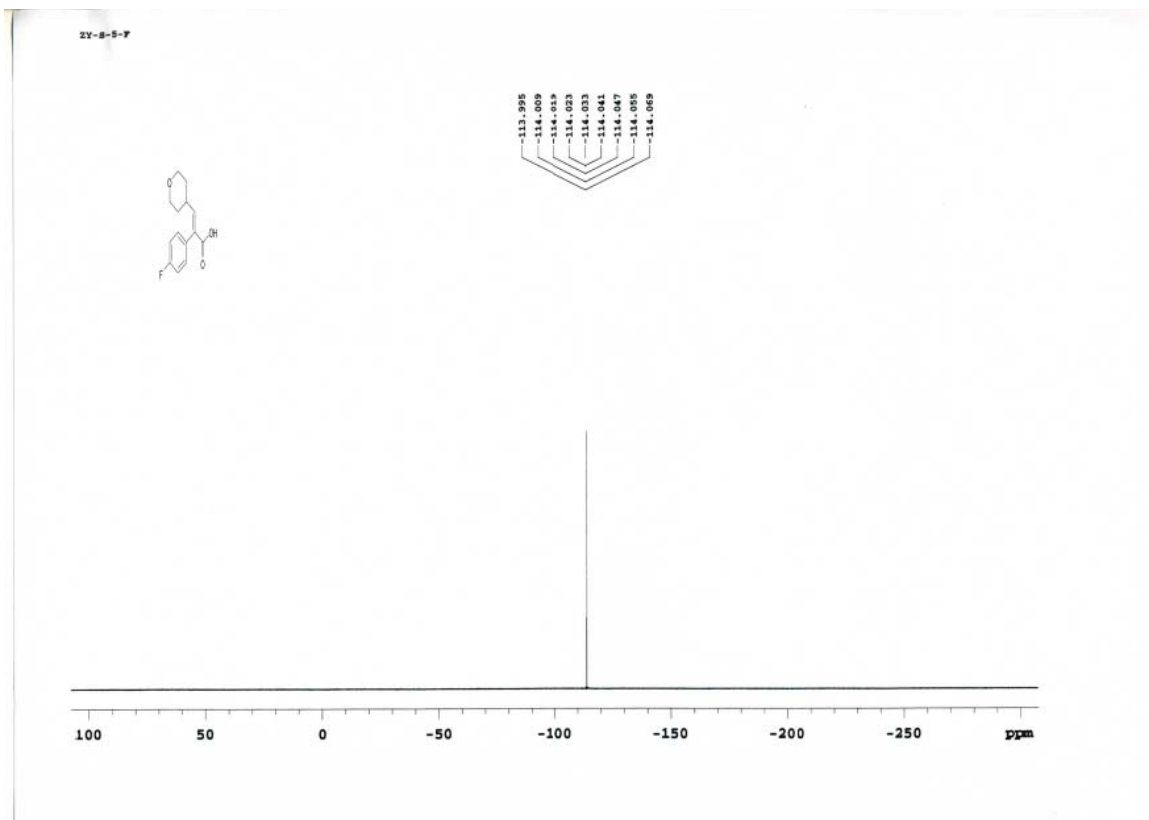

**Compound 1h**

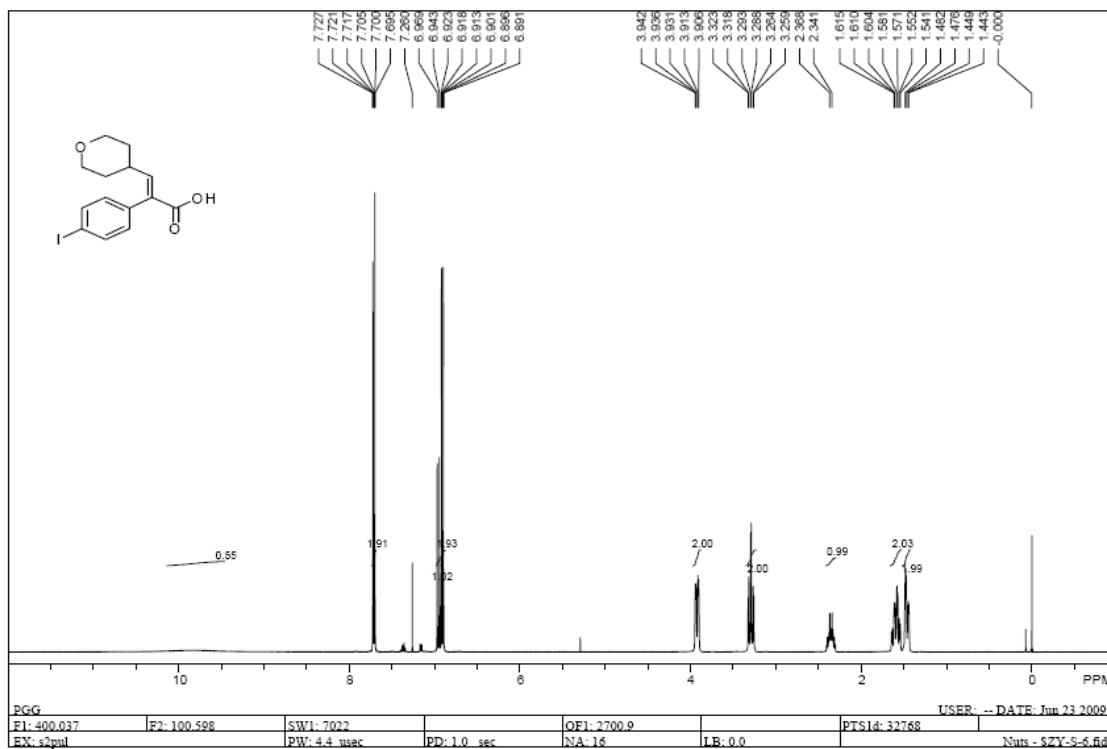

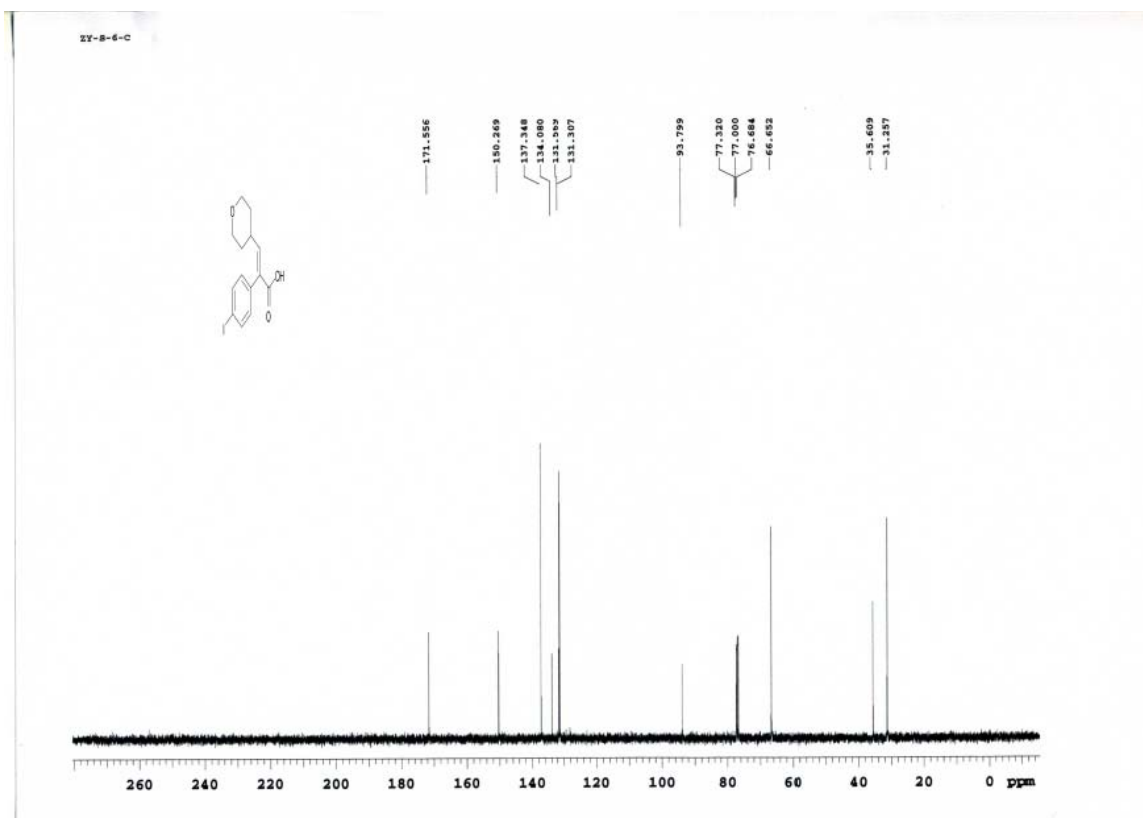

Compound 3a

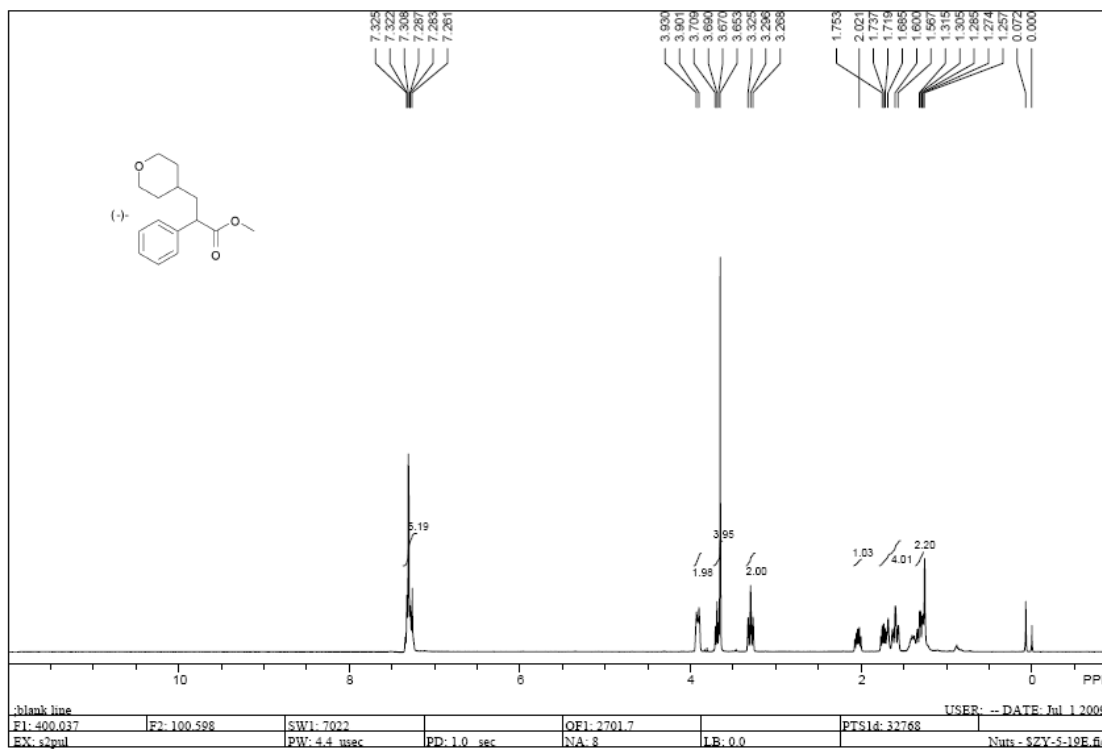



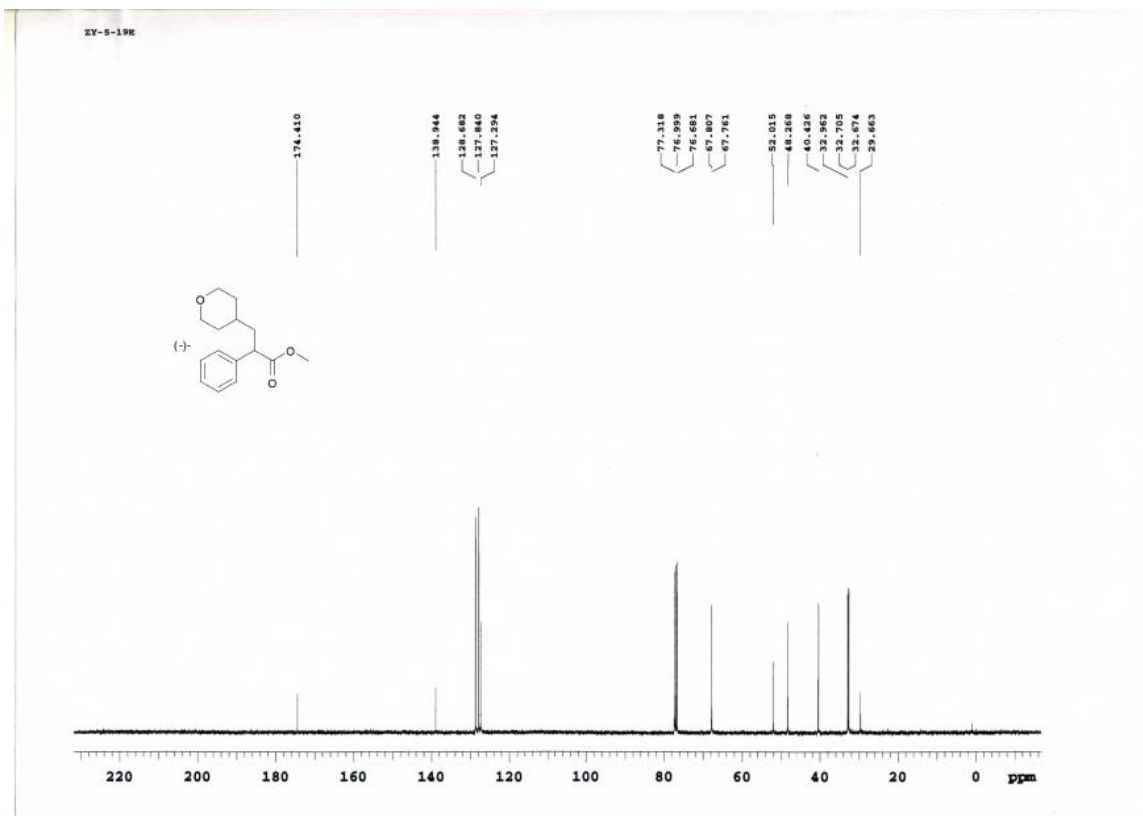

**Compound 3f**

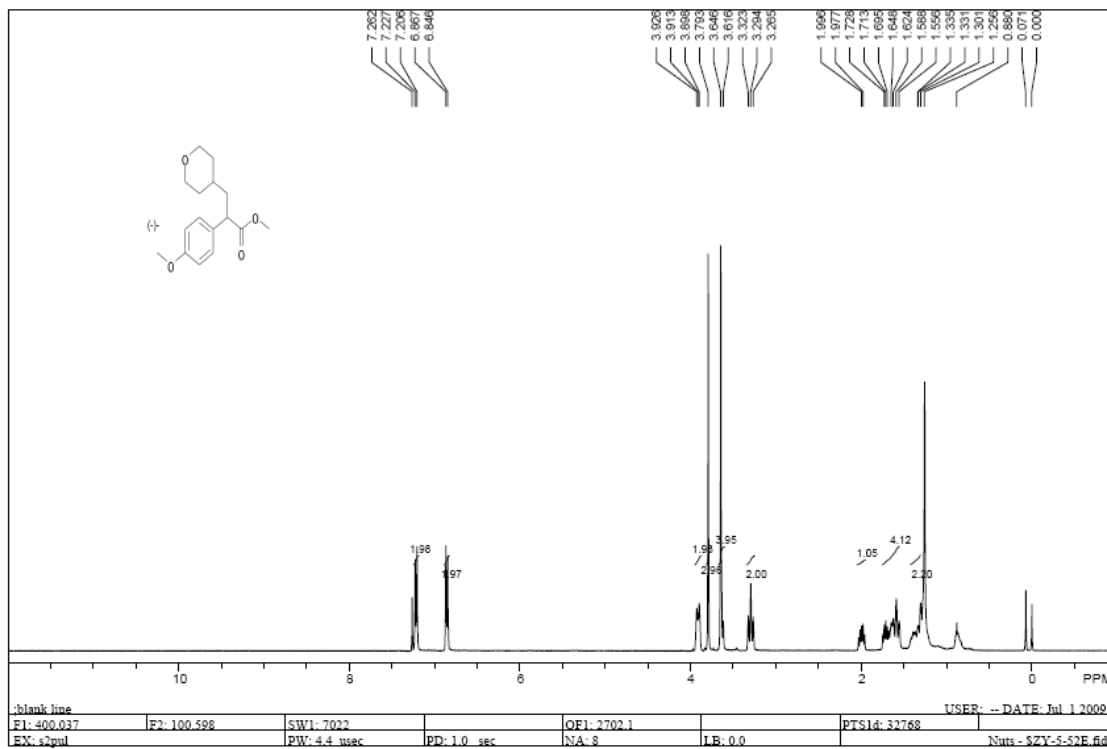

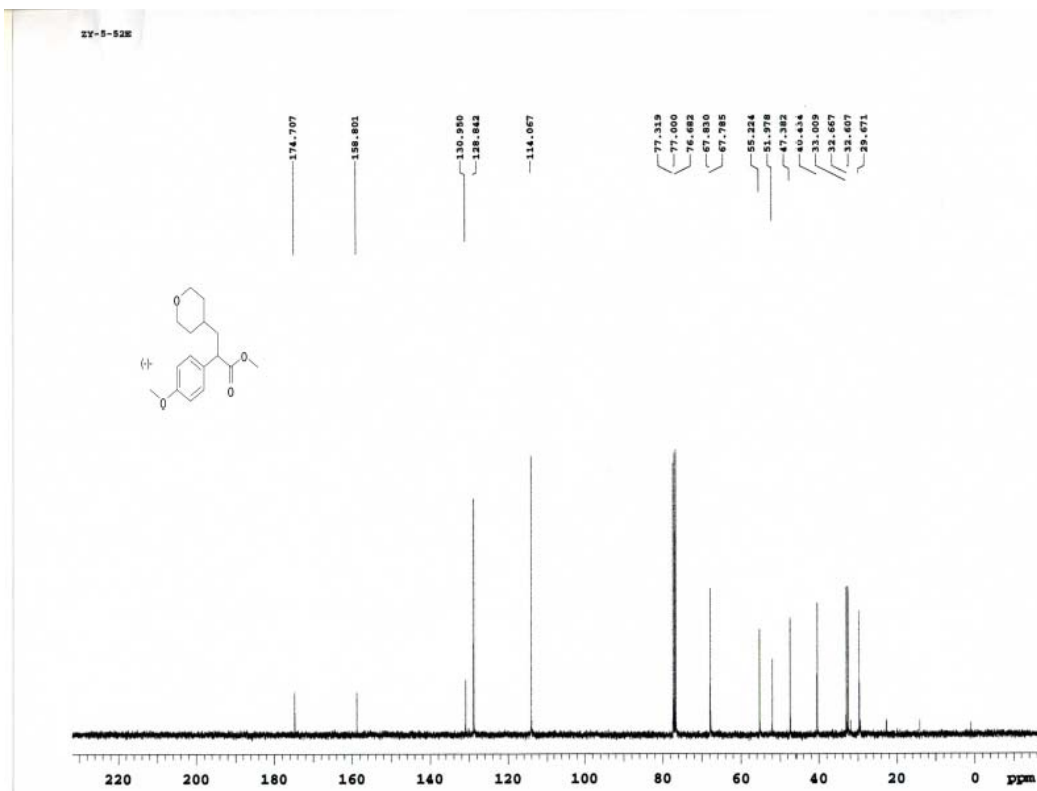

Compound 3g

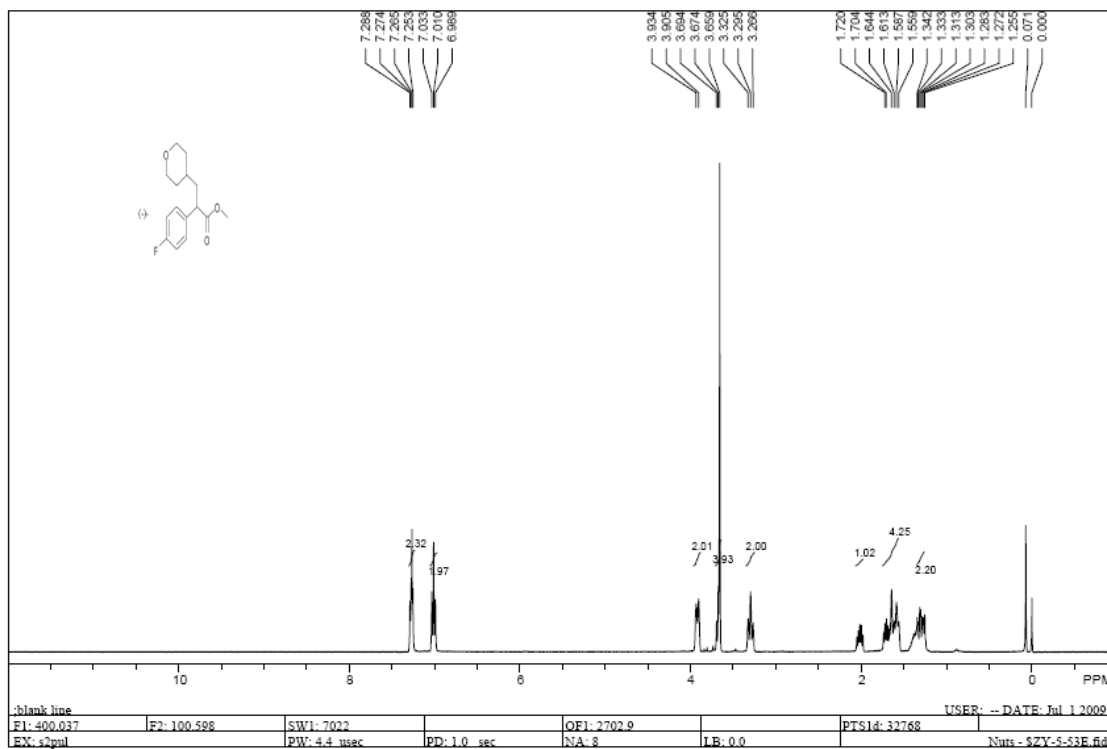

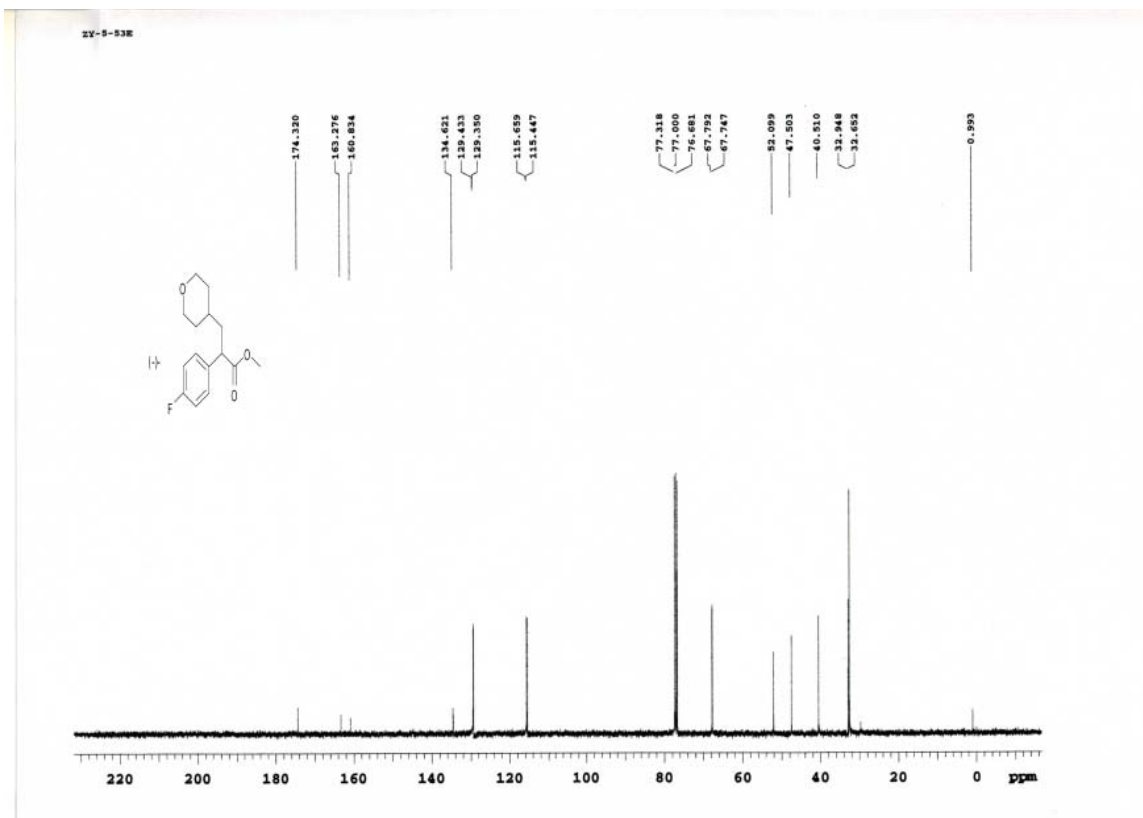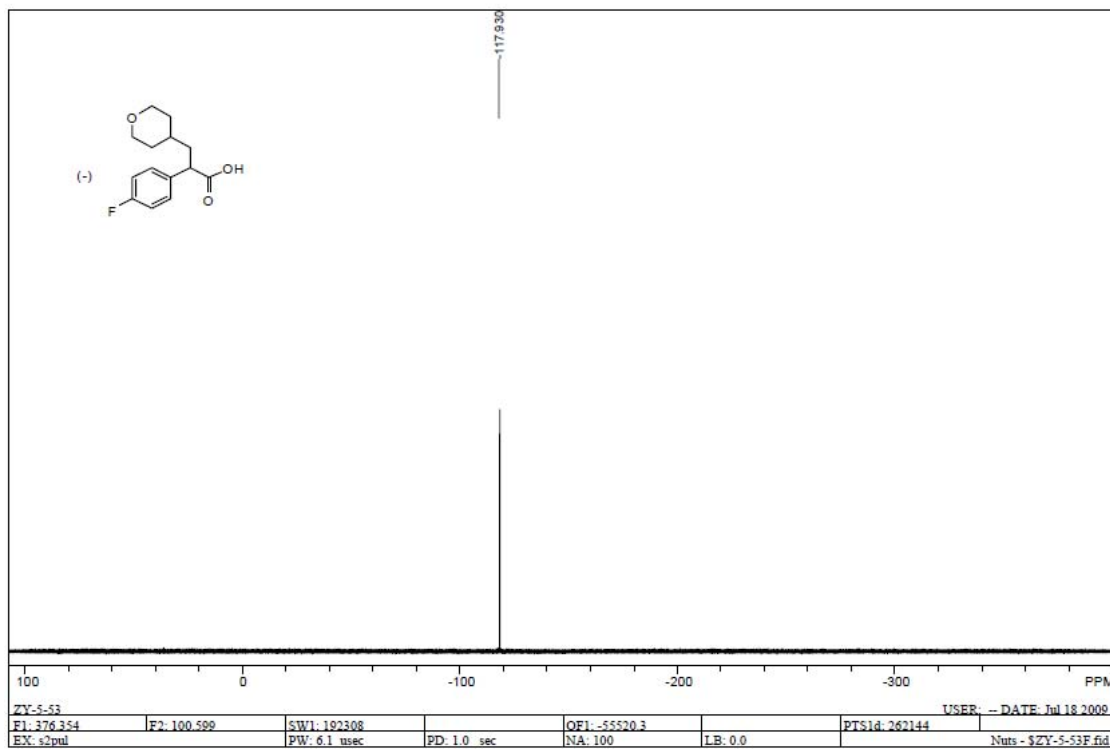

### Compound 3h

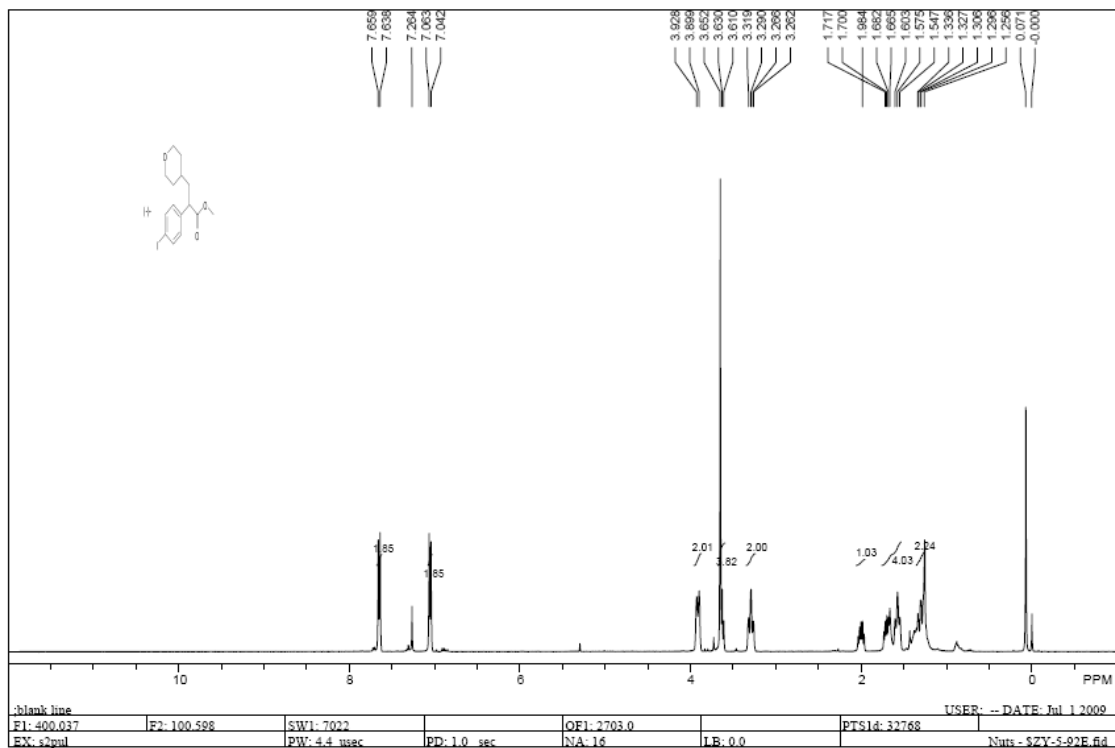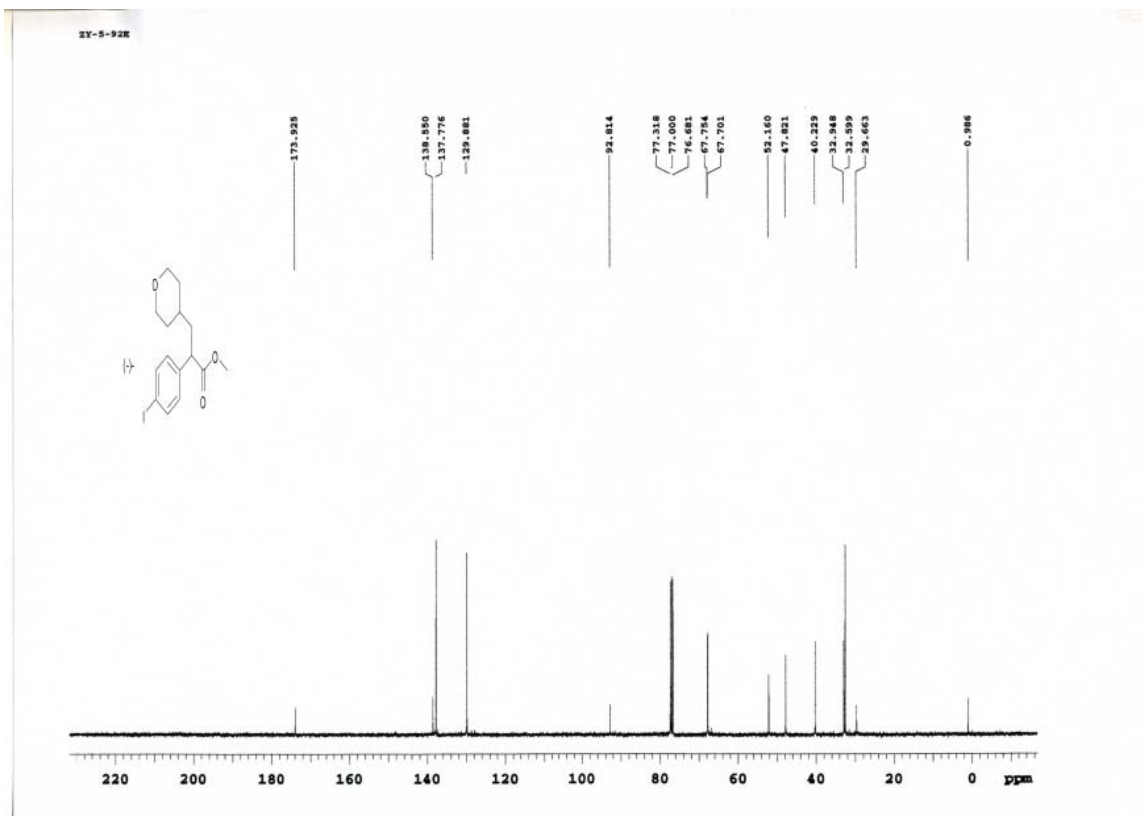

## HPLC Chromatograms for the asymmetric hydrogenation reactions Reaction of 1a

Notes:AD-H, 99:1, 1.0 mL/min, 230 nm

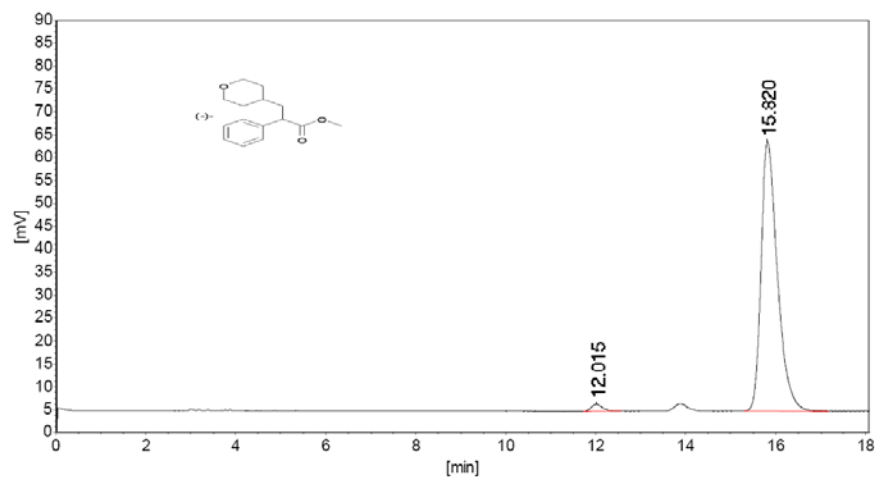

### General Results

| Nos.          | Compound | R.Time | Height[uV] | Area[uV*S] | Area%     | Conc. (%) | Type |
|---------------|----------|--------|------------|------------|-----------|-----------|------|
| 1             |          | 12.015 | 1528       | 26514      | 1.75736   | 1.75736   | BB   |
| 2             |          | 15.820 | 58805      | 1482219    | 98.24264  | 98.24264  | BB   |
| <b>Total:</b> |          |        | 60333      | 1508733    | 100.00000 | 100.00000 |      |

Notes:AD-H, 99:1, 1.0 mL/min, 230 nm

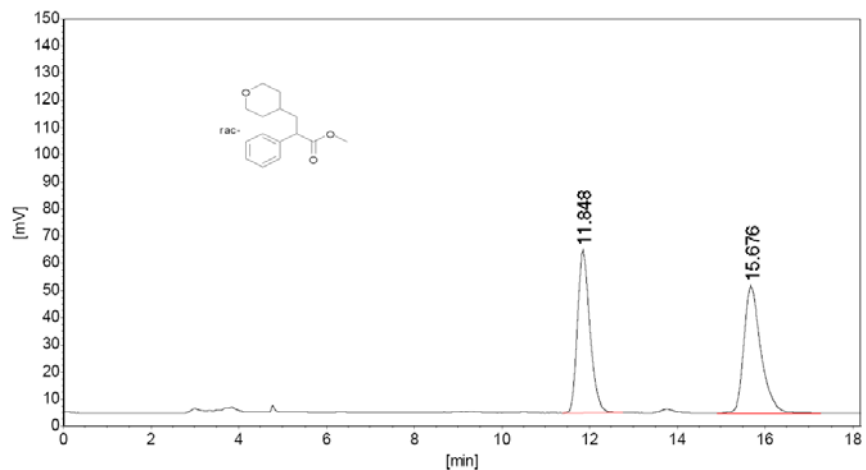

### General Results

| Nos.          | Compound | R.Time | Height[uV] | Area[uV*S] | Area%     | Conc. (%) | Type |
|---------------|----------|--------|------------|------------|-----------|-----------|------|
| 1             |          | 11.848 | 59475      | 1197678    | 48.68448  | 48.68448  | BB   |
| 2             |          | 15.676 | 46377      | 1262403    | 51.31552  | 51.31552  | BB   |
| <b>Total:</b> |          |        | 105852     | 2460081    | 100.00000 | 100.00000 |      |

## Reaction of 1b

Notes:0J, 99:1, 1.0 mL/min, 230 nm

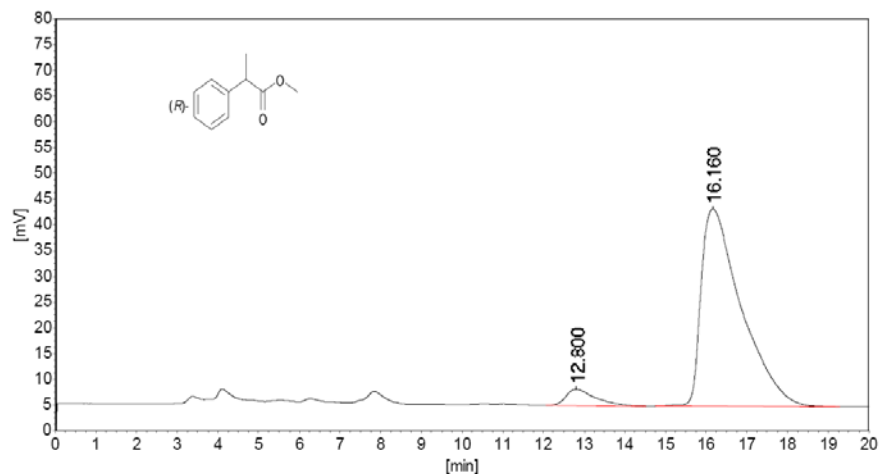

### General Results

| Nos.          | Compound | R.Time | Height[uV] | Area[uV*S] | Area%     | Type |
|---------------|----------|--------|------------|------------|-----------|------|
| 1             |          | 12.800 | 3176       | 158492     | 5.69386   | BB   |
| 2             |          | 16.160 | 38230      | 2625064    | 94.30614  | BB   |
| <b>Total:</b> |          |        | 41406      | 2783556    | 100.00000 |      |

Notes:0J, 99:1, 1.0 mL/min, 230 nm

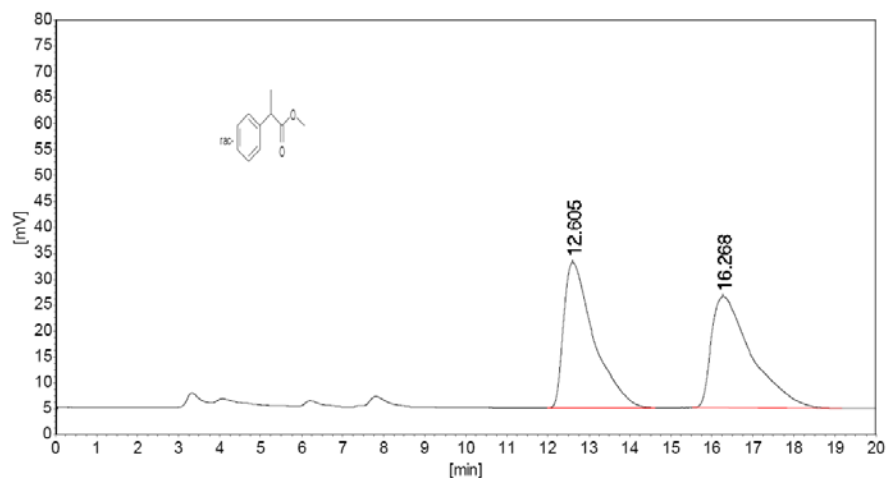

### General Results

| Nos.          | Compound | R.Time | Height[uV] | Area[uV*S] | Area%     | Type |
|---------------|----------|--------|------------|------------|-----------|------|
| 1             |          | 12.605 | 28013      | 1422835    | 49.55247  | BB   |
| 2             |          | 16.268 | 21362      | 1448536    | 50.44753  | BB   |
| <b>Total:</b> |          |        | 49375      | 2871371    | 100.00000 |      |

## Reaction of 1c

Notes:0D-H, 99:1, 1.0 mL/min, 230 nm

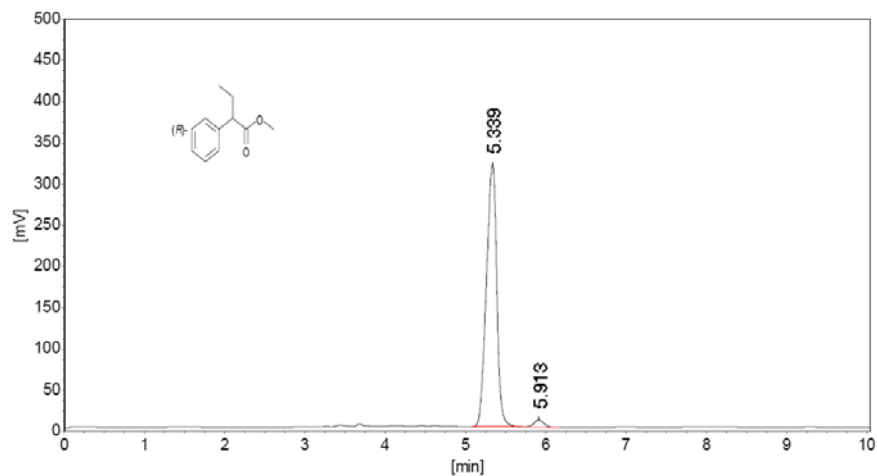

### General Results

| Nos.          | Compound | R.Time | Height[uV] | Area[uV*S] | Area%     | Conc. (%) | Type |
|---------------|----------|--------|------------|------------|-----------|-----------|------|
| 1             |          | 5.339  | 317946     | 2888718    | 97.41819  | 97.41819  | BB   |
| 2             |          | 5.913  | 8918       | 76558      | 2.58181   | 2.58181   | BB   |
| <b>Total:</b> |          |        | 326864     | 2965276    | 100.00000 | 100.00000 |      |

Notes:0D-H, 99:1, 1.0 mL/min, 230 nm

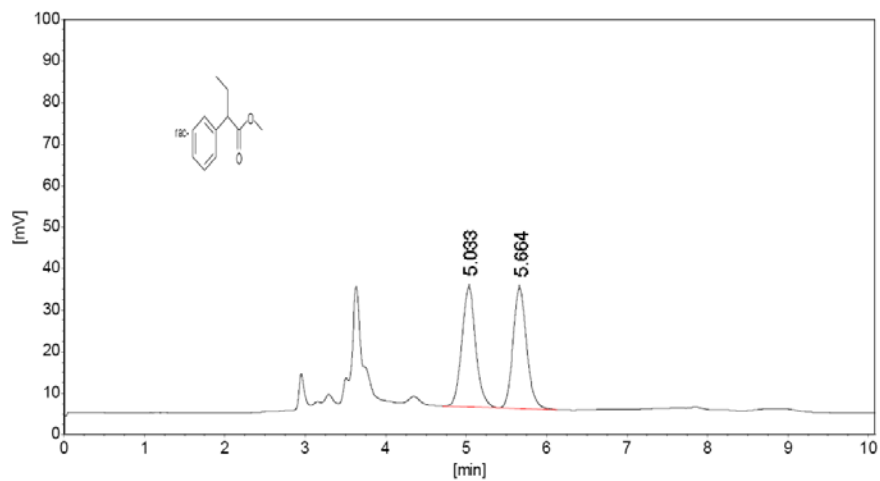

### General Results

| Nos.          | Compound | R.Time | Height[uV] | Area[uV*S] | Area%     | Conc. (%) | Type |
|---------------|----------|--------|------------|------------|-----------|-----------|------|
| 1             |          | 5.033  | 28800      | 346976     | 50.43784  | 50.43784  | BB   |
| 2             |          | 5.664  | 28979      | 340952     | 49.56216  | 49.56216  | BB   |
| <b>Total:</b> |          |        | 57779      | 687928     | 100.00000 | 100.00000 |      |

## Reaction of 1d

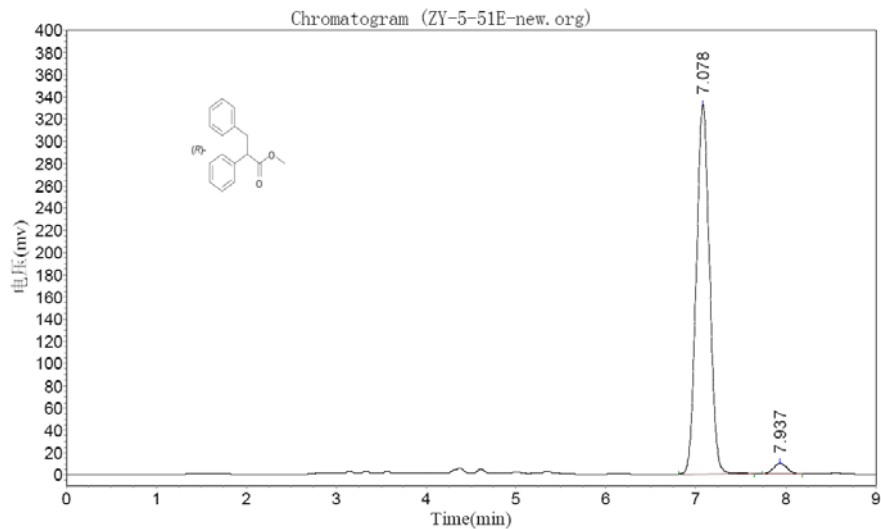

### Results

| Peak No. | Peak ID | Ret Time | Height     | Area        | Conc.    |
|----------|---------|----------|------------|-------------|----------|
| 1        |         | 7.078    | 332953.813 | 3402421.250 | 97.0954  |
| 2        |         | 7.937    | 9867.821   | 101784.297  | 2.9046   |
| Total    |         |          | 342821.634 | 3504205.547 | 100.0000 |

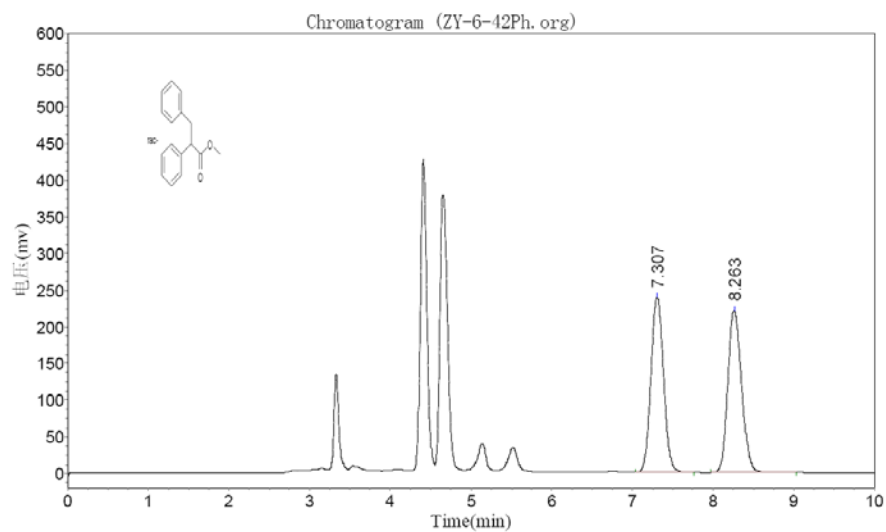

### Results

| Peak No. | Peak ID | Ret Time | Height     | Area        | Conc.    |
|----------|---------|----------|------------|-------------|----------|
| 1        |         | 7.307    | 239132.984 | 2610626.000 | 49.8525  |
| 2        |         | 8.263    | 220567.641 | 2626079.250 | 50.1475  |
| Total    |         |          | 459700.625 | 5236705.250 | 100.0000 |



## Reaction of 1e

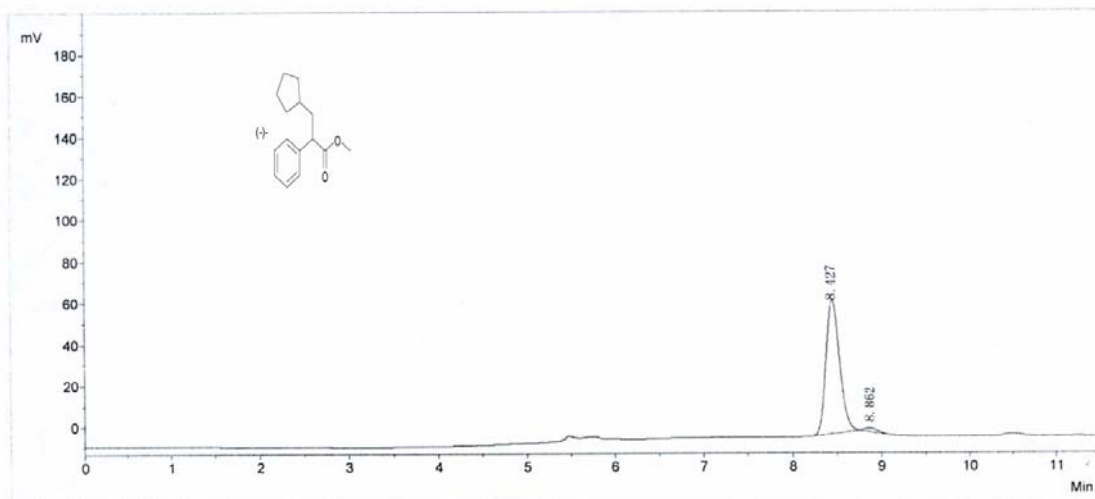

| No.   | PeakNo | R. Time | PeakHeight | PeakArea | PerCent  |
|-------|--------|---------|------------|----------|----------|
| 1     | 1      | 8.427   | 61734.6    | 688286.7 | 97.7256  |
| 2     | 2      | 8.862   | 1657.8     | 16018.7  | 2.2744   |
| Total |        |         | 63392.3    | 704305.4 | 100.0000 |

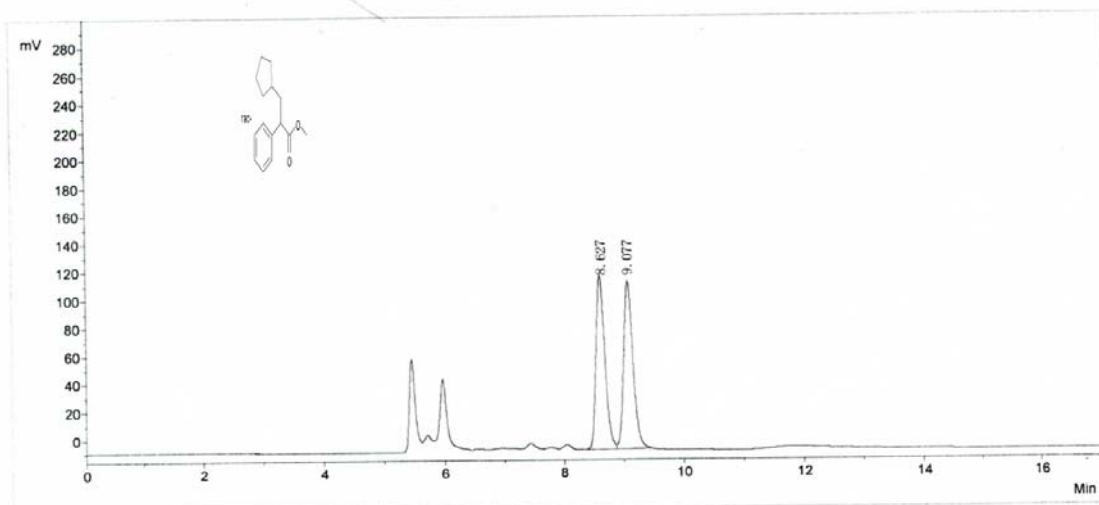

| No.   | PeakNo | R. Time | PeakHeight | PeakArea  | PerCent  |
|-------|--------|---------|------------|-----------|----------|
| 1     | 1      | 8.627   | 120107.0   | 1287527.6 | 49.8823  |
| 2     | 2      | 9.077   | 119461.8   | 1293604.0 | 50.1177  |
| Total |        |         | 239568.8   | 2581131.5 | 100.0000 |

## Reaction of 1f

Notes:AD-H, 92:8, 0.7 mL/min, 230 nm

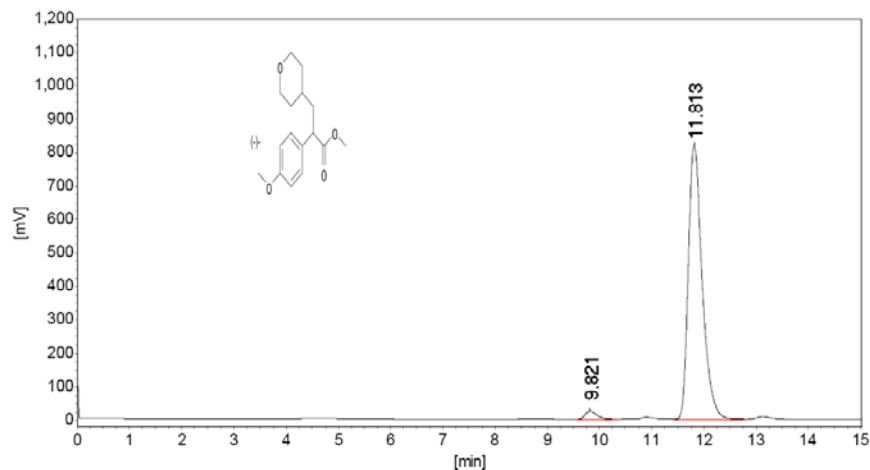

### General Results

| Nos.          | Compound | R.Time | Height[uV] | Area[uV*S] | Area%     | Type |
|---------------|----------|--------|------------|------------|-----------|------|
| 1             |          | 9.821  | 25241      | 363686     | 2.36019   | BB   |
| 2             |          | 11.813 | 819035     | 15045487   | 97.63981  | BB   |
| <b>Total:</b> |          |        | 844276     | 15409173   | 100.00000 |      |

Notes:AD-H, 92:8, 0.7 mL/min, 230 nm

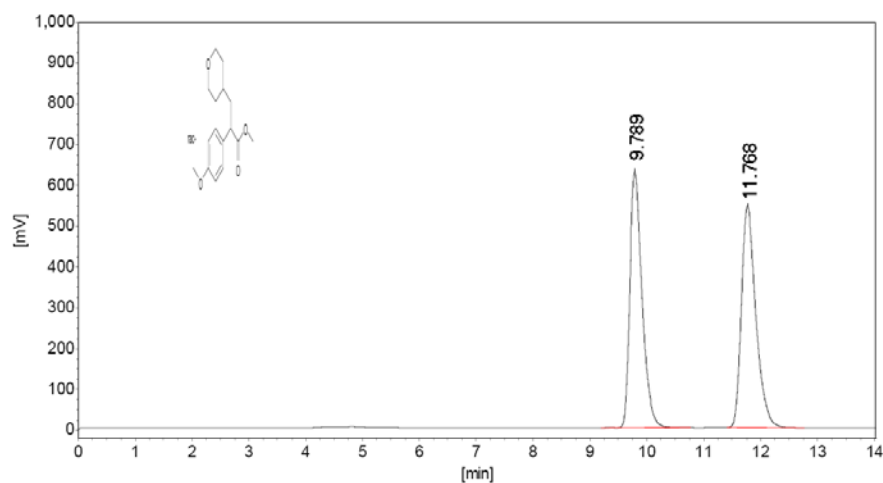

### General Results

| Nos.          | Compound | R.Time | Height[uV] | Area[uV*S] | Area%     | Type |
|---------------|----------|--------|------------|------------|-----------|------|
| 1             |          | 9.789  | 627888     | 9394519    | 49.26728  | BB   |
| 2             |          | 11.768 | 544496     | 9673955    | 50.73272  | BB   |
| <b>Total:</b> |          |        | 1172384    | 19068474   | 100.00000 |      |

## Reaction of 1g

Notes:AD-H, 99:1, 1.0 mL/min, 230 nm

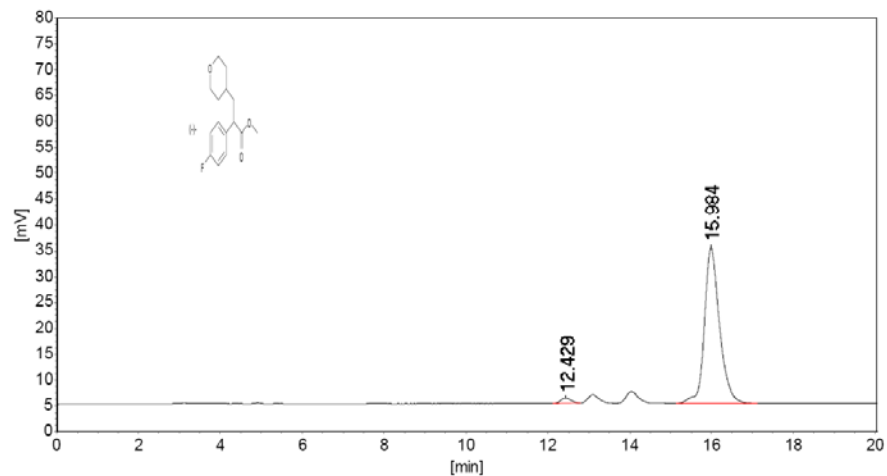

### General Results

| Nos.          | Compound | R.Time | Height[uV] | Area[uV*S] | Area%     | Type |
|---------------|----------|--------|------------|------------|-----------|------|
| 1             |          | 12.429 | 1018       | 17583      | 2.22281   | BB   |
| 2             |          | 15.984 | 30181      | 773462     | 97.77719  | BB   |
| <b>Total:</b> |          |        | 31199      | 791045     | 100.00000 |      |

Notes:AD-H, 99:1, 1.0 mL/min, 230 nm

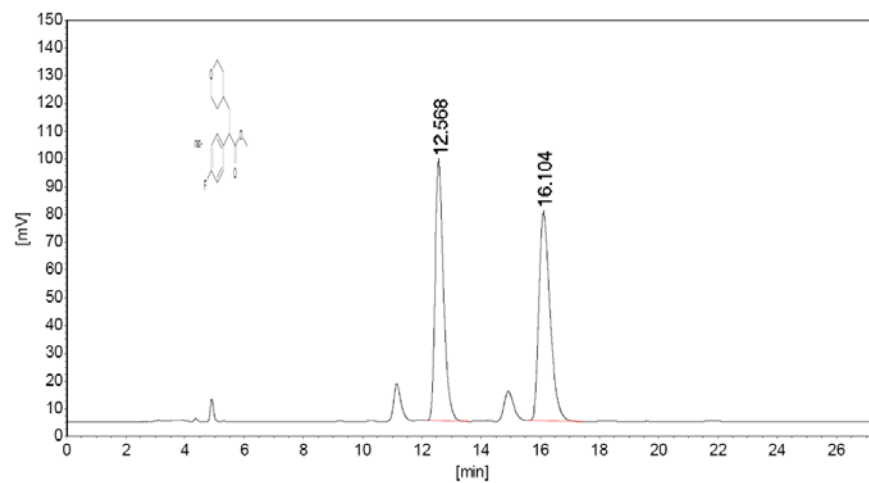

### General Results

| Nos.          | Compound | R.Time | Height[uV] | Area[uV*S] | Area%     | Type |
|---------------|----------|--------|------------|------------|-----------|------|
| 1             |          | 12.568 | 93315      | 1854932    | 48.93168  | BB   |
| 2             |          | 16.104 | 74691      | 1935930    | 51.06832  | BB   |
| <b>Total:</b> |          |        | 168006     | 3790862    | 100.00000 |      |

## Reaction of 1h

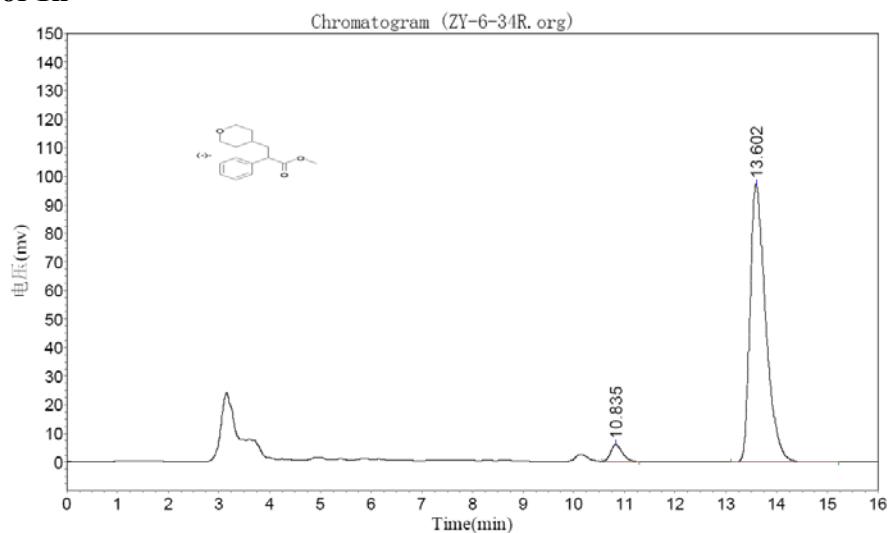

### Results

| Peak No.     | Peak ID | Ret Time | Height     | Area        | Conc.    |
|--------------|---------|----------|------------|-------------|----------|
| 1            |         | 10.835   | 5994.114   | 93924.797   | 4.3097   |
| 2            |         | 13.602   | 97307.961  | 2085458.125 | 95.6903  |
| <b>Total</b> |         |          | 103302.075 | 2179382.922 | 100.0000 |

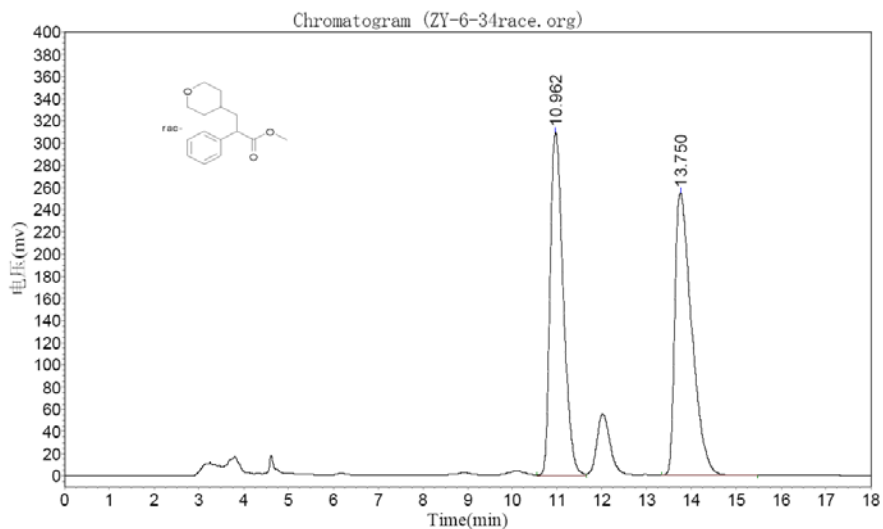

### Results

| Peak No.     | Peak ID | Ret Time | Height     | Area         | Conc.    |
|--------------|---------|----------|------------|--------------|----------|
| 1            |         | 10.962   | 309558.438 | 6258053.500  | 48.6340  |
| 2            |         | 13.750   | 255178.297 | 6609609.500  | 51.3660  |
| <b>Total</b> |         |          | 564736.734 | 12867663.000 | 100.0000 |

## Reaction of 1i

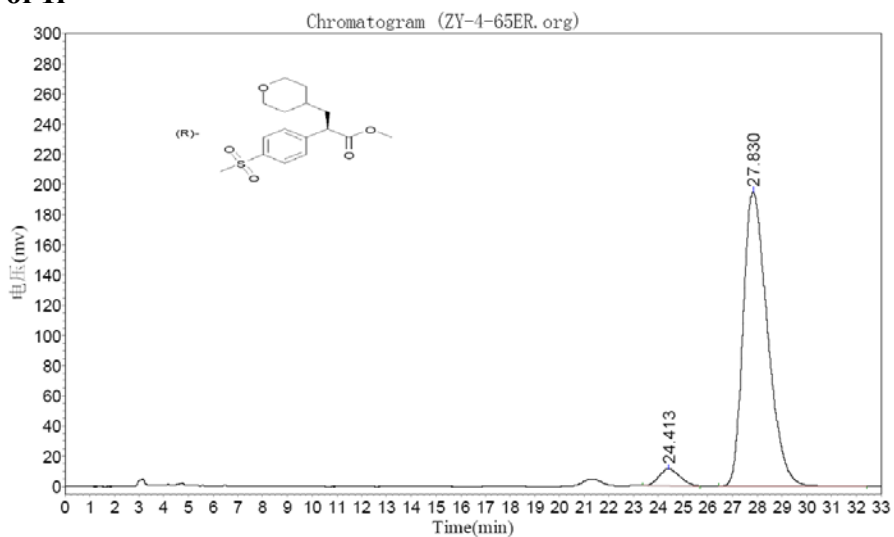

### Results

| Peak No.     | Peak ID | Ret Time | Height     | Area         | Conc.    |
|--------------|---------|----------|------------|--------------|----------|
| 1            |         | 24.413   | 10977.248  | 625055.313   | 4.4857   |
| 2            |         | 27.830   | 195013.750 | 13309214.000 | 95.5143  |
| <b>Total</b> |         |          | 205990.998 | 13934269.312 | 100.0000 |

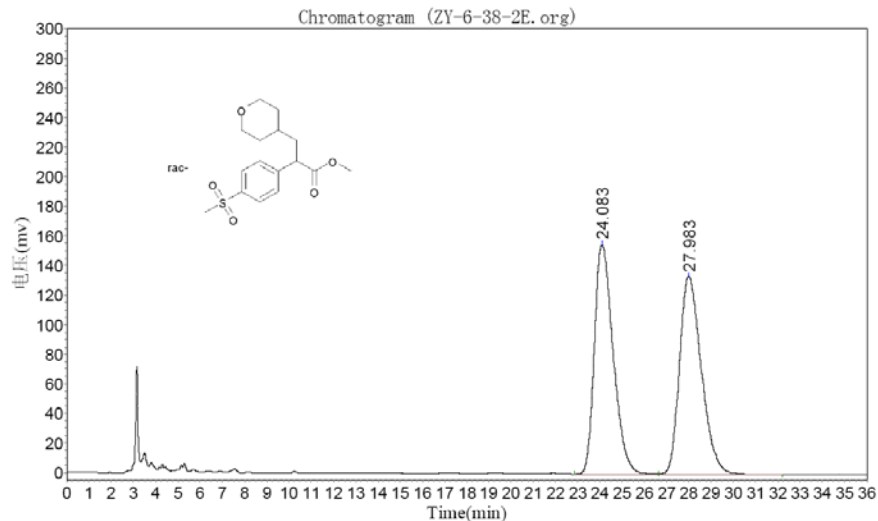

### Results

| Peak No.     | Peak ID | Ret Time | Height     | Area         | Conc.    |
|--------------|---------|----------|------------|--------------|----------|
| 1            |         | 24.083   | 155066.469 | 9099944.000  | 49.9911  |
| 2            |         | 27.983   | 133297.188 | 9103187.000  | 50.0089  |
| <b>Total</b> |         |          | 288363.656 | 18203131.000 | 100.0000 |

## Reaction of 1j

Notes:OD-H(New), 80:20, 0.7 mL/min, 230 nm

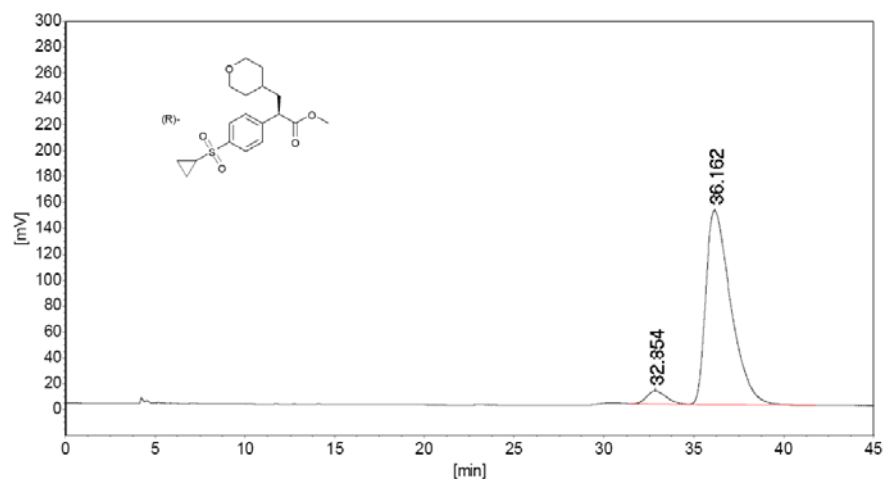

### General Results

| Nos.          | Compound | R.Time | Height[uV] | Area[uV*S] | Area%     | Conc. (%) | Type |
|---------------|----------|--------|------------|------------|-----------|-----------|------|
| 1             |          | 32.854 | 10150      | 777317     | 5.08358   | 5.08358   | BB   |
| 2             |          | 36.162 | 149602     | 14513427   | 94.91642  | 94.91642  | BB   |
| <b>Total:</b> |          |        | 159752     | 15290744   | 100.00000 | 100.00000 |      |

Notes:OD-H(New), 80:20, 0.7 mL/min, 230 nm

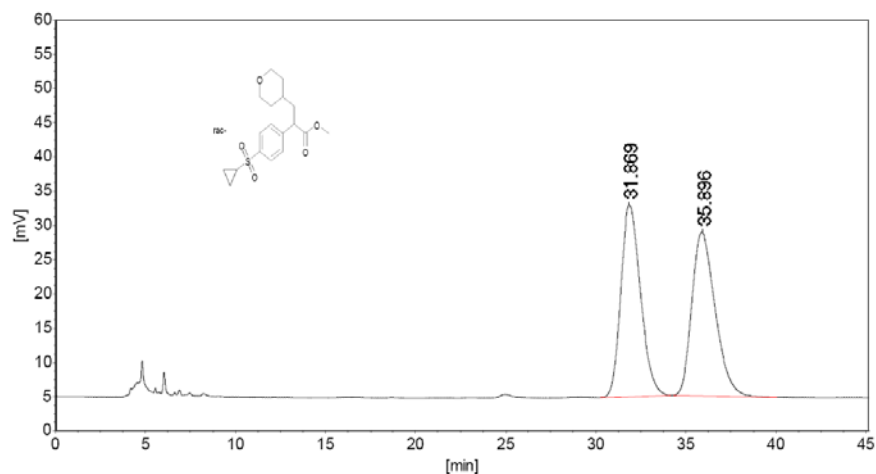

### General Results

| Nos.          | Compound | R.Time | Height[uV] | Area[uV*S] | Area%     | Conc. (%) | Type |
|---------------|----------|--------|------------|------------|-----------|-----------|------|
| 1             |          | 31.869 | 28013      | 2123052    | 49.65721  | 49.65721  | BB   |
| 2             |          | 35.896 | 23937      | 2152363    | 50.34279  | 50.34279  | BB   |
| <b>Total:</b> |          |        | 51950      | 4275415    | 100.00000 | 100.00000 |      |

## Reaction of 1k

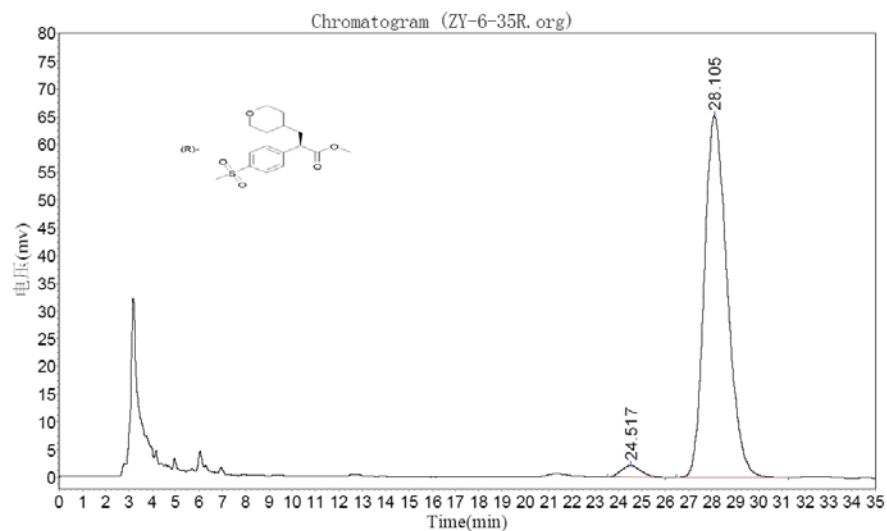

### Results

| Peak No.     | Peak ID | Ret Time | Height    | Area        | Conc.    |
|--------------|---------|----------|-----------|-------------|----------|
| 1            |         | 24.517   | 2097.542  | 122911.805  | 2.6956   |
| 2            |         | 28.105   | 65150.445 | 4436835.500 | 97.3044  |
| <b>Total</b> |         |          | 67247.987 | 4559747.305 | 100.0000 |

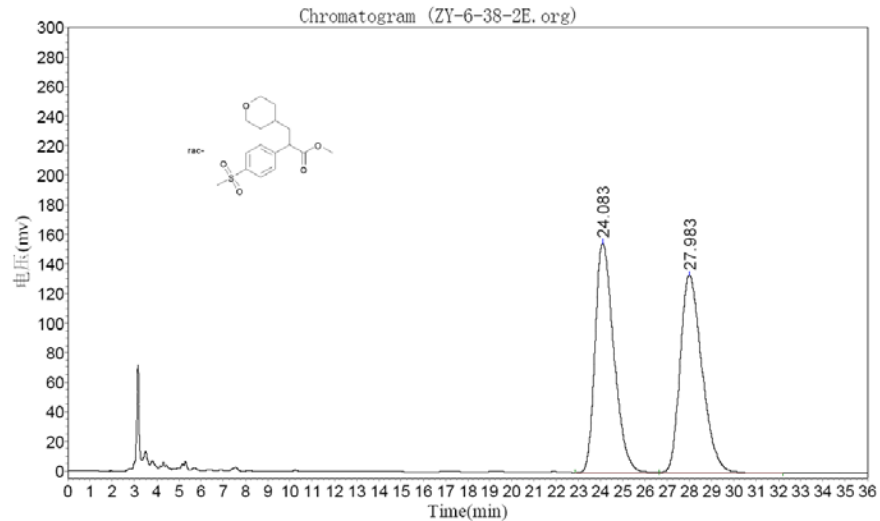

### Results

| Peak No.     | Peak ID | Ret Time | Height     | Area         | Conc.    |
|--------------|---------|----------|------------|--------------|----------|
| 1            |         | 24.083   | 155066.469 | 9099944.000  | 49.9911  |
| 2            |         | 27.983   | 133297.188 | 9103187.000  | 50.0089  |
| <b>Total</b> |         |          | 288363.656 | 18203131.000 | 100.0000 |

## Reaction of 11

Notes:0D-H, 80:20, 0.7 mL/min, 230 nm

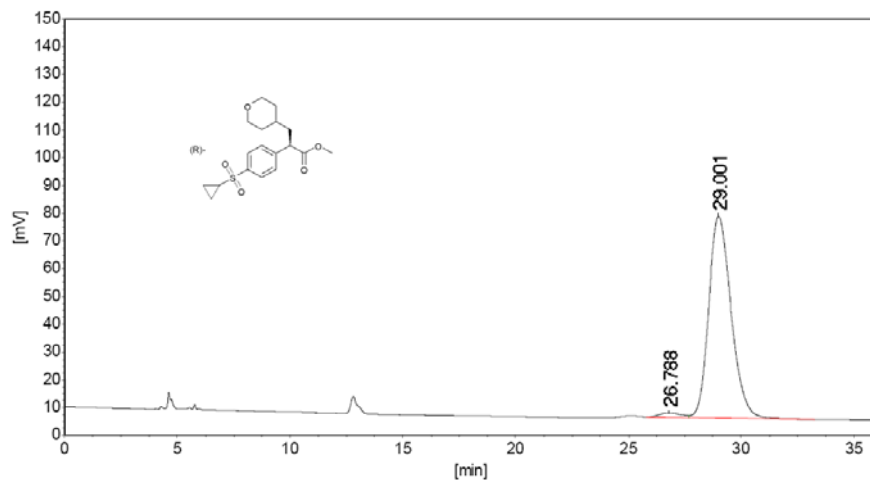

### General Results

| Nos.          | Compound | R.Time | Height[uV] | Area[uV*S] | Area%     | Type |
|---------------|----------|--------|------------|------------|-----------|------|
| 1             |          | 26.788 | 1622       | 102639     | 2.01144   | BV   |
| 2             |          | 29.001 | 72449      | 5000111    | 97.98856  | VB   |
| <b>Total:</b> |          |        | 74071      | 5102750    | 100.00000 |      |

Notes:0D-H, 80:20, 0.7 mL/min, 230 nm

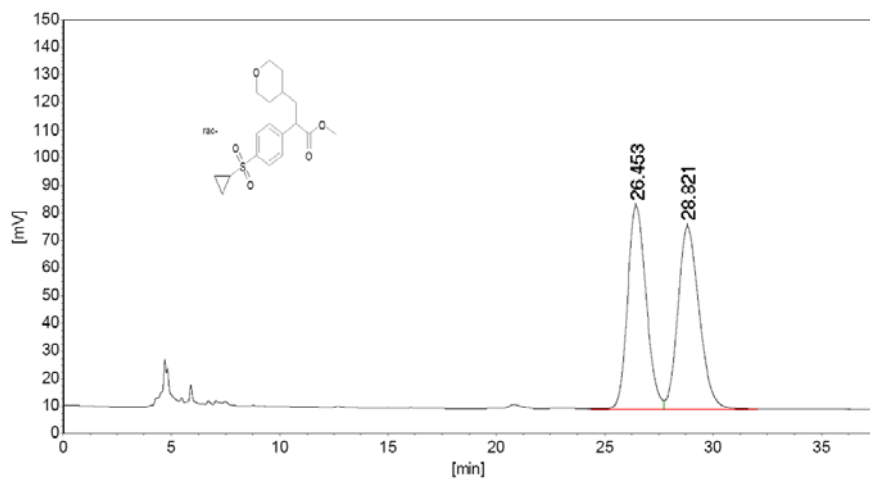

### General Results

| Nos.          | Compound | R.Time | Height[uV] | Area[uV*S] | Area%     | Type |
|---------------|----------|--------|------------|------------|-----------|------|
| 1             |          | 26.453 | 73416      | 4350209    | 49.19520  | BV   |
| 2             |          | 28.821 | 66124      | 4492542    | 50.80480  | VB   |
| <b>Total:</b> |          |        | 139540     | 8842751    | 100.00000 |      |
